# Supplementary material for: Photoplethysmography upon cold stress—impact of measurement site and acquisition mode
Source: Frontiers journal article supplement (doi:10.3389/fphys.2023.1127624), 2023-06-01
Supplement: Data_Sheet_1.PDF [file Data_Sheet_1.PDF]

## Supplementary Material

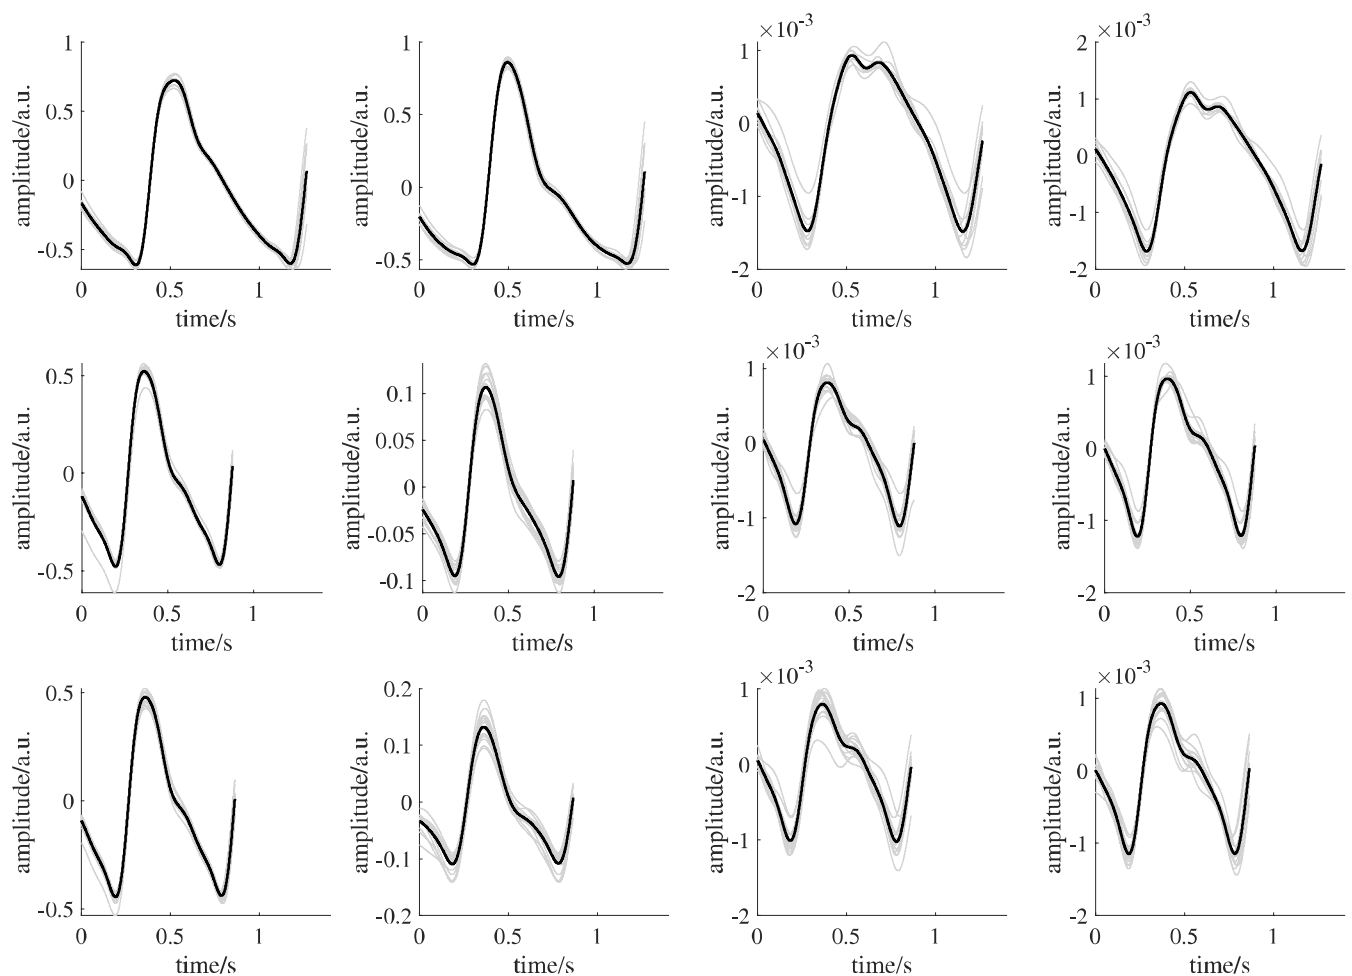

**Figure S1.** Template generation of one subject. From left to right: earlobe PPG (BL: 10 beats, ST1: 15 beats, ST2: 16 beats), finger PPG (BL: 10 beats, ST1: 15 beats, ST2: 15 beats), forehead iPPG (BL: 10 beats, ST1: 16 beats, ST2: 15 beats), super ROI iPPG (BL: 10 beats, ST1: 15 beats, ST2: 15 beats). The upper row shows signals during BL. The middle row shows signals during ST1. The lower row shows signals during ST2. Black lines indicate mean beat templates; gray lines indicate the corresponding beat segments.

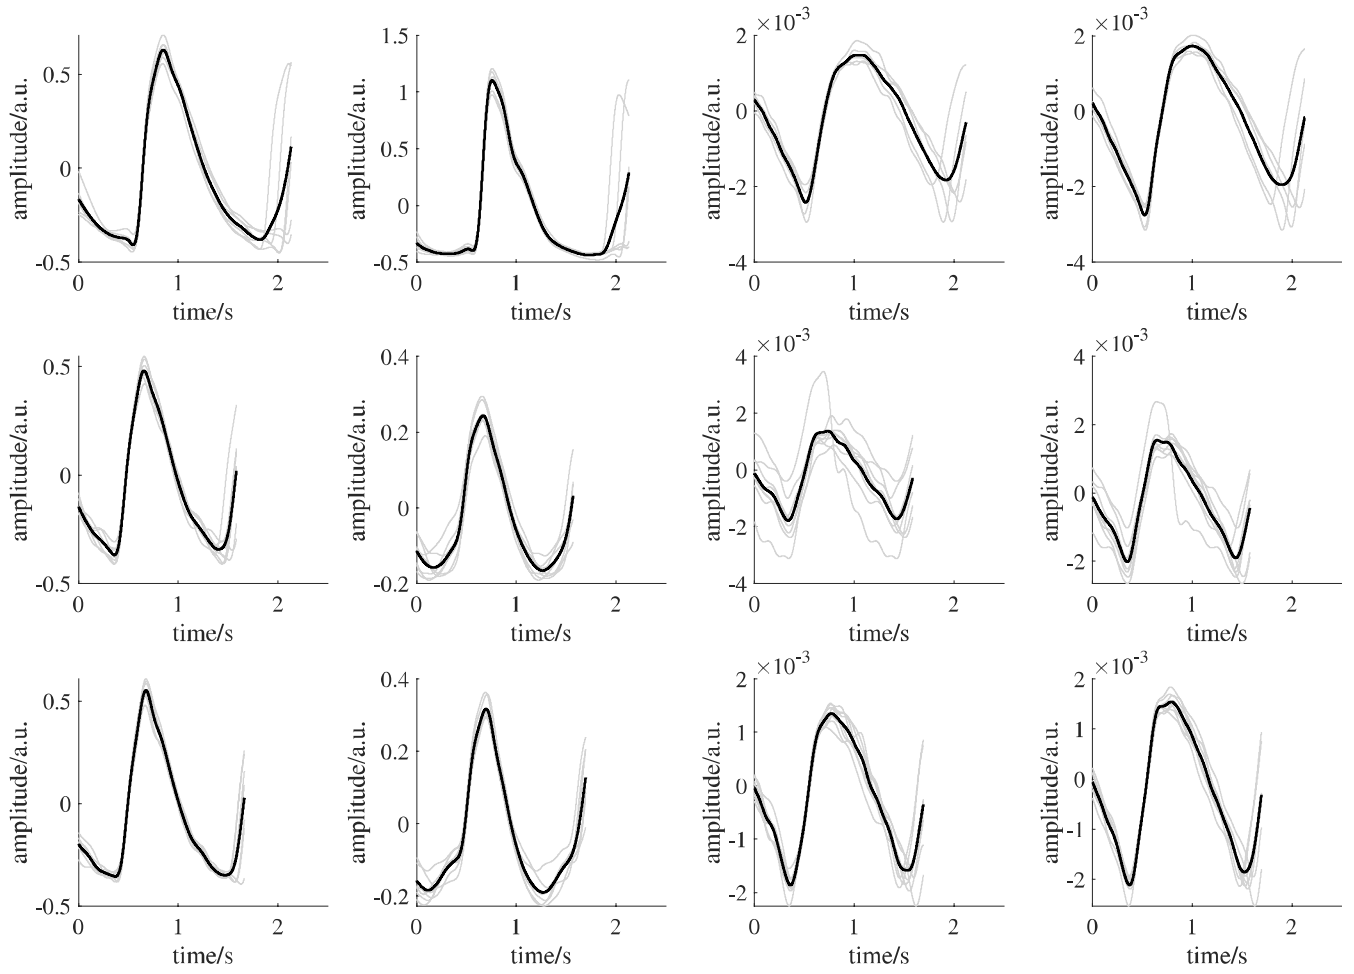

**Figure S2.** Template generation of one subject. From left to right: earlobe PPG (BL: 6 beats, ST1: 8 beats, ST2: 7 beats), finger PPG (BL: 6 beats, ST1: 8 beats, ST2: 7 beats), forehead iPPG (BL: 5 beats, ST1: 8 beats, ST2: 8 beats), super ROI iPPG (BL: 5 beats, ST1: 8 beats, ST2: 8 beats). The upper row shows signals during BL. The middle row shows signals during ST1. The lower row shows signals during ST2. Black lines indicate mean beat templates; gray lines indicate the corresponding beat segments.

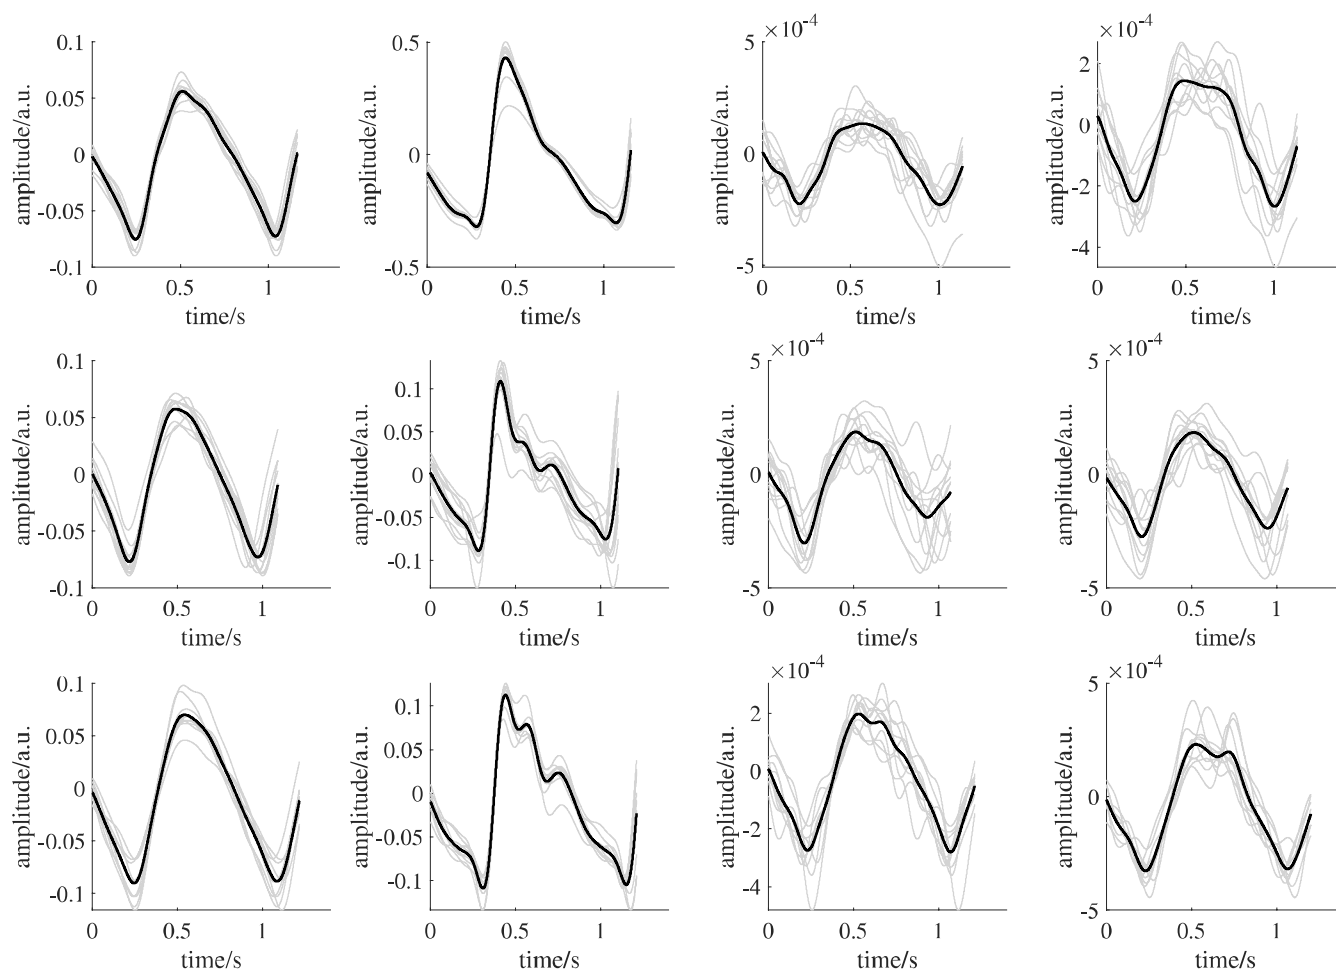

**Figure S3.** Template generation of one subject. From left to right: earlobe PPG (BL: 11 beats, ST1: 12 beats, ST2: 10 beats), finger PPG (BL: 11 beats, ST1: 12 beats, ST2: 10 beats), forehead iPPG (BL: 12 beats, ST1: 12 beats, ST2: 10 beats), super ROI iPPG (BL: 12 beats, ST1: 12 beats, ST2: 10 beats). The upper row shows signals during BL. The middle row shows signals during ST1. The lower row shows signals during ST2. Black lines indicate mean beat templates; gray lines indicate the corresponding beat segments.

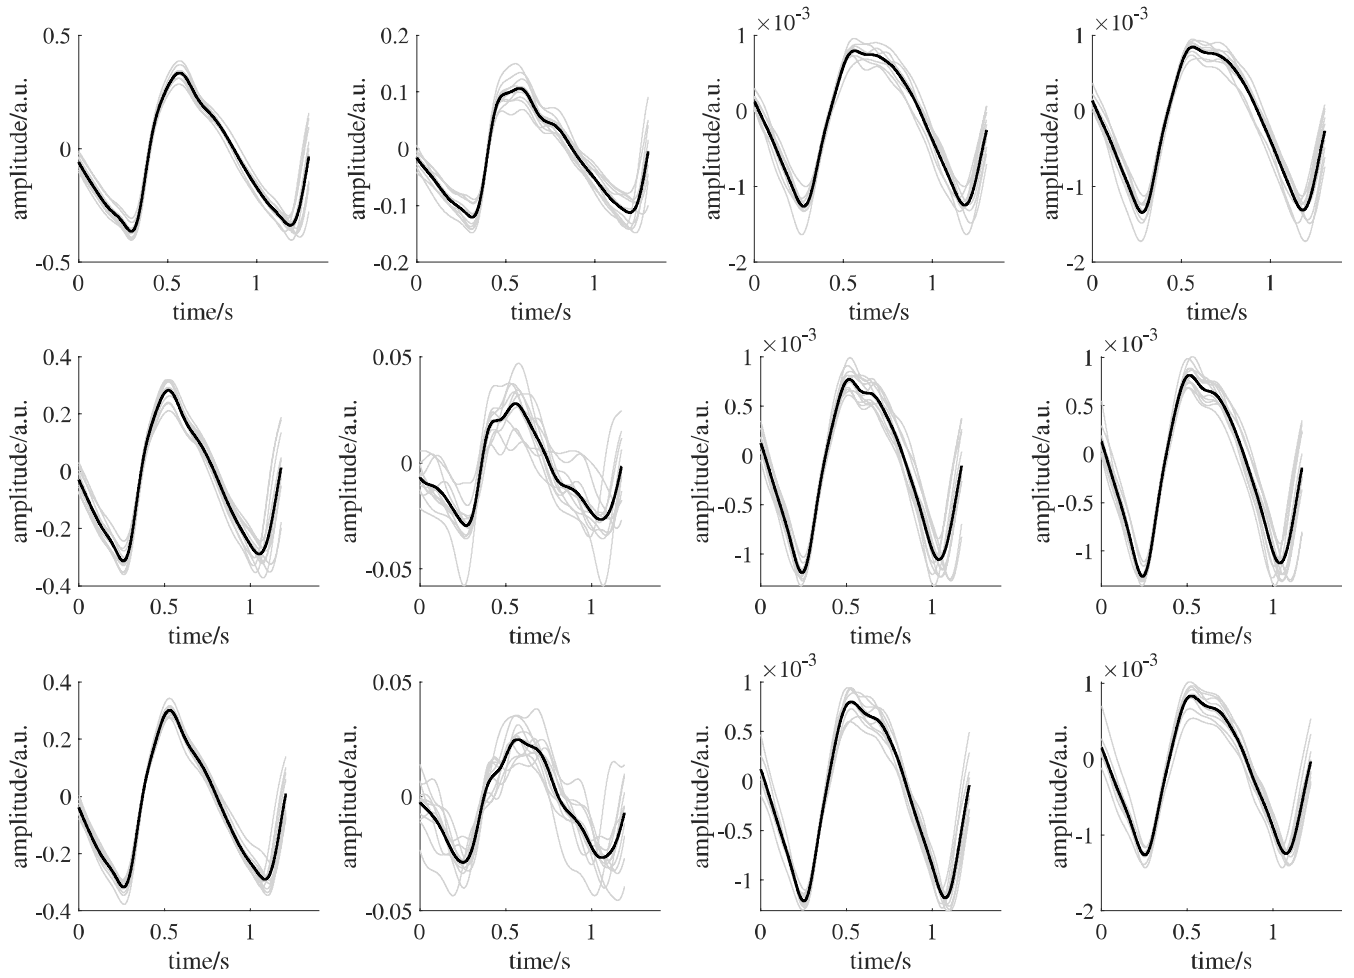

**Figure S4.** Template generation of one subject. From left to right: earlobe PPG (BL: 10 beats, ST1: 11 beats, ST2: 11 beats), finger PPG (BL: 10 beats, ST1: 11 beats, ST2: 11 beats), forehead iPPG (BL: 9 beats, ST1: 11 beats, ST2: 10 beats), super ROI iPPG (BL: 9 beats, ST1: 11 beats, ST2: 10 beats). The upper row shows signals during BL. The middle row shows signals during ST1. The lower row shows signals during ST2. Black lines indicate mean beat templates; gray lines indicate the corresponding beat segments.



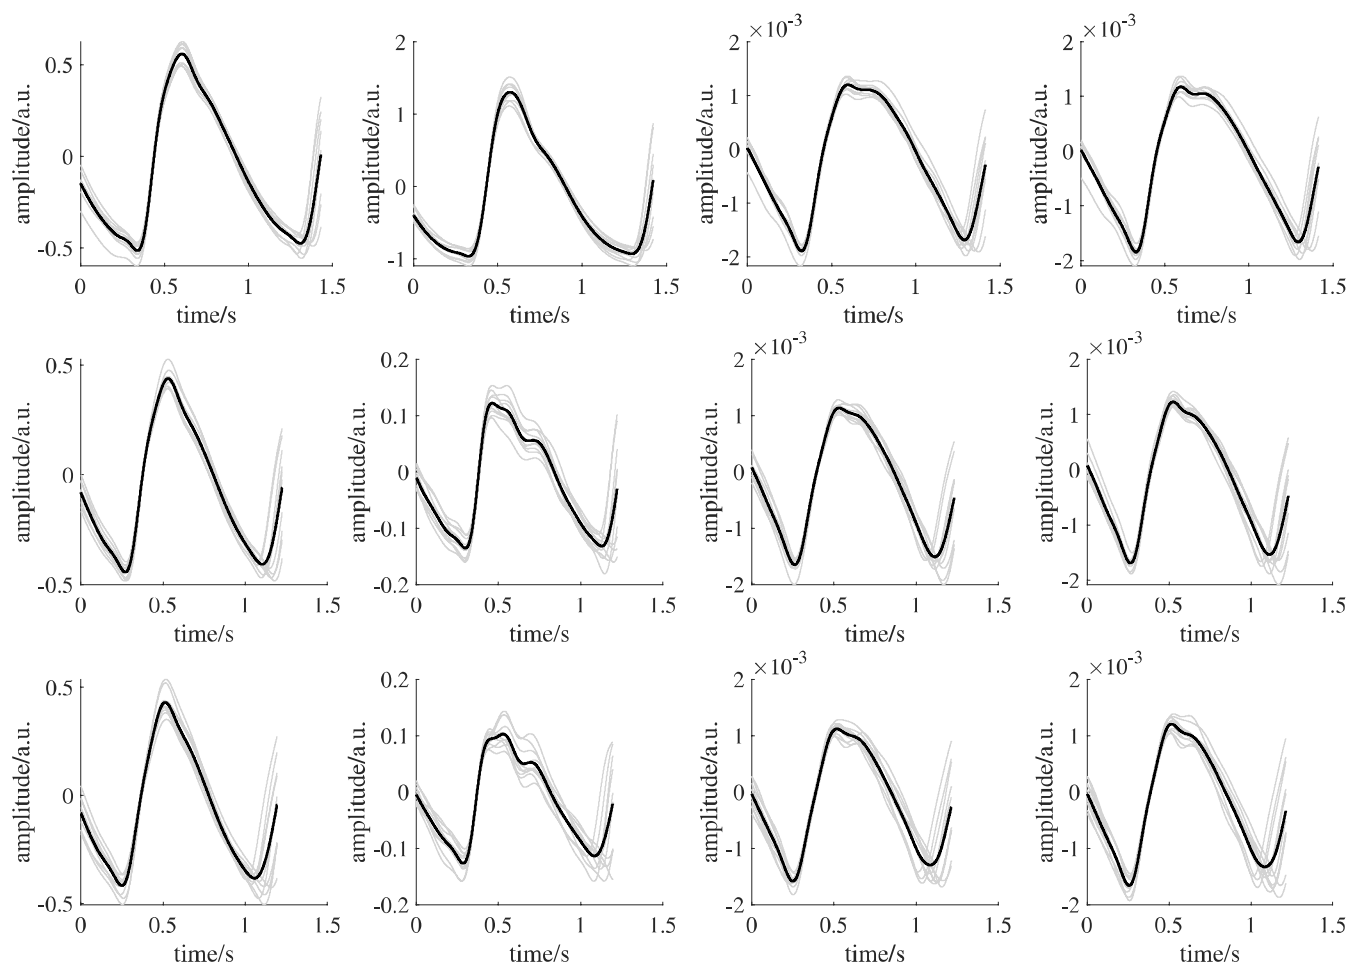

**Figure S5.** Template generation of one subject. From left to right: earlobe PPG (BL: 9 beats, ST1: 10 beats, ST2: 10 beats), finger PPG (BL: 9 beats, ST1: 10 beats, ST2: 10 beats), forehead iPPG (BL: 9 beats, ST1: 10 beats, ST2: 11 beats), super ROI iPPG (BL: 9 beats, ST1: 10 beats, ST2: 11 beats). The upper row shows signals during BL. The middle row shows signals during ST1. The lower row shows signals during ST2. Black lines indicate mean beat templates; gray lines indicate the corresponding beat segments.

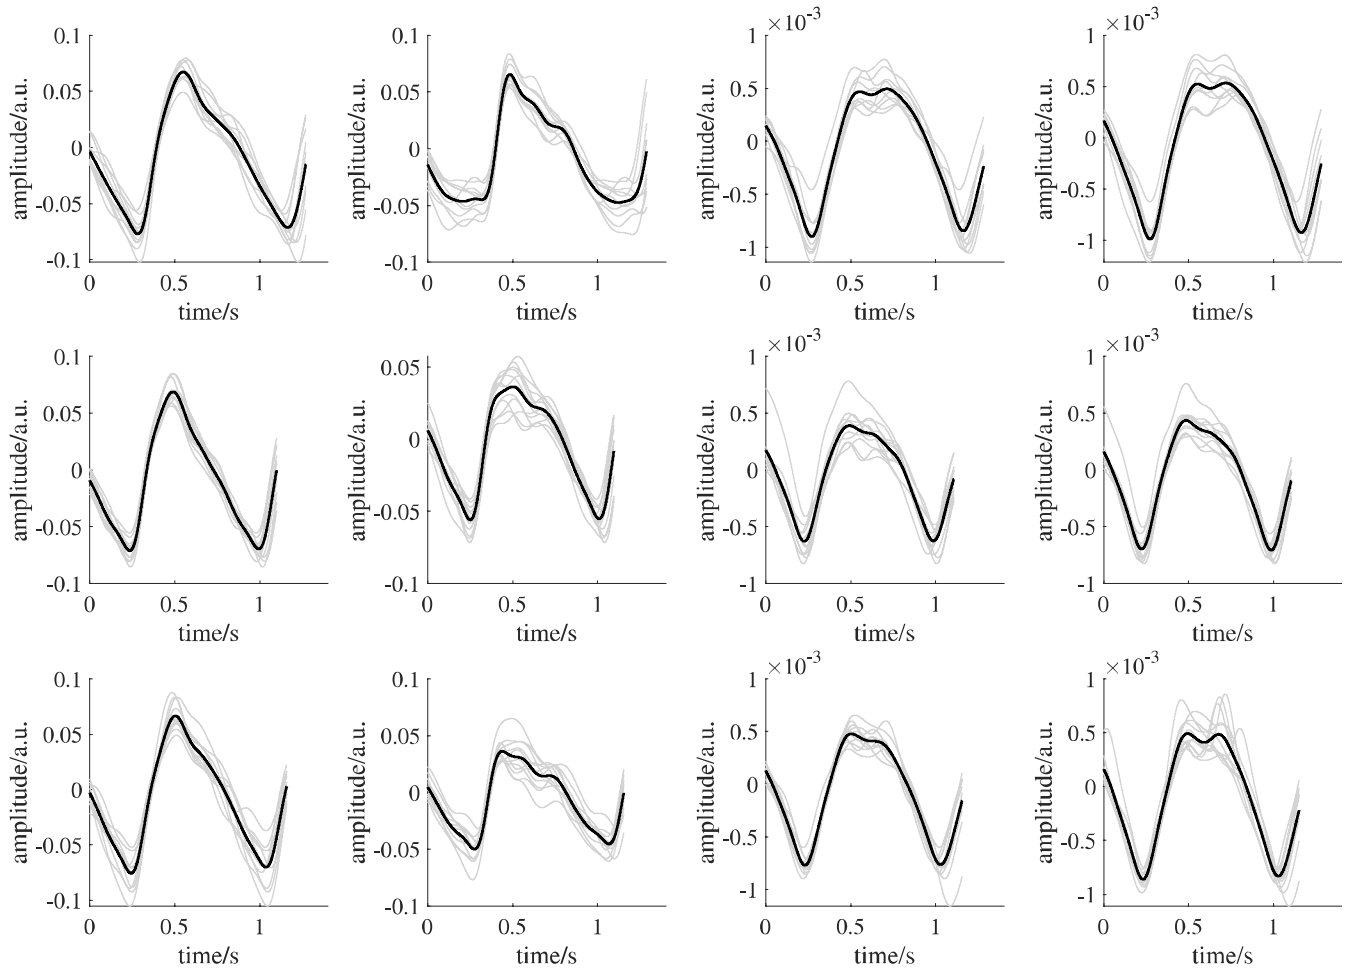

**Figure S6.** Template generation of one subject. From left to right: earlobe PPG (BL: 10 beats, ST1: 12 beats, ST2: 11 beats), finger PPG (BL: 10 beats, ST1: 12 beats, ST2: 11 beats), forehead iPPG (BL: 10 beats, ST1: 11 beats, ST2: 11 beats), super ROI iPPG (BL: 10 beats, ST1: 11 beats, ST2: 11 beats). The upper row shows signals during BL. The middle row shows signals during ST1. The lower row shows signals during ST2. Black lines indicate mean beat templates; gray lines indicate the corresponding beat segments.

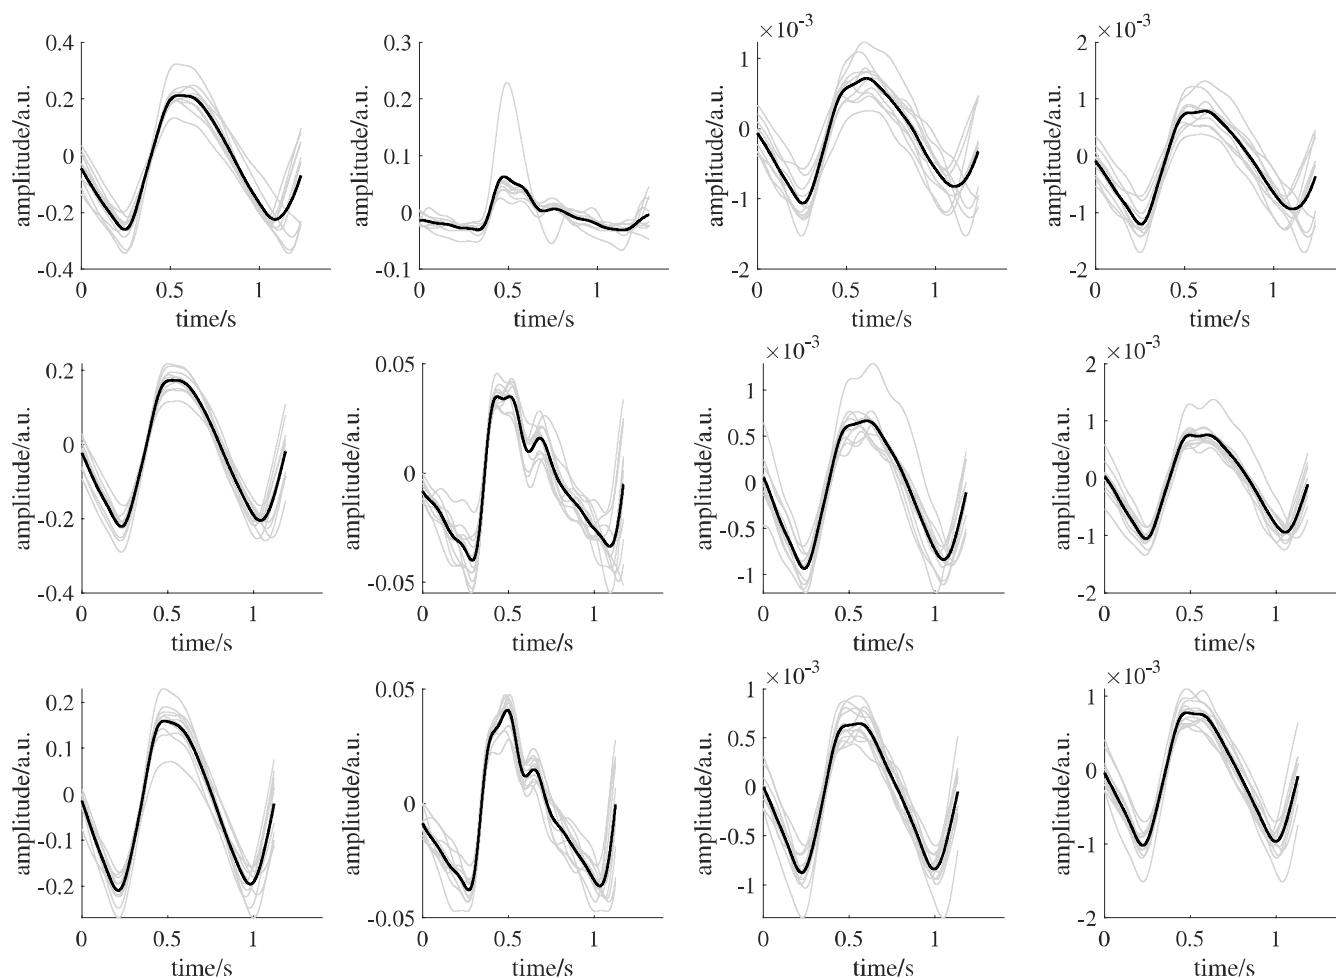

**Figure S7.** Template generation of one subject. From left to right: earlobe PPG (BL: 10 beats, ST1: 11 beats, ST2: 11 beats), finger PPG (BL: 9 beats, ST1: 11 beats, ST2: 11 beats), forehead iPPG (BL: 10 beats, ST1: 11 beats, ST2: 12 beats), super ROI iPPG (BL: 10 beats, ST1: 11 beats, ST2: 12 beats). The upper row shows signals during BL. The middle row shows signals during ST1. The lower row shows signals during ST2. Black lines indicate mean beat templates; gray lines indicate the corresponding beat segments.

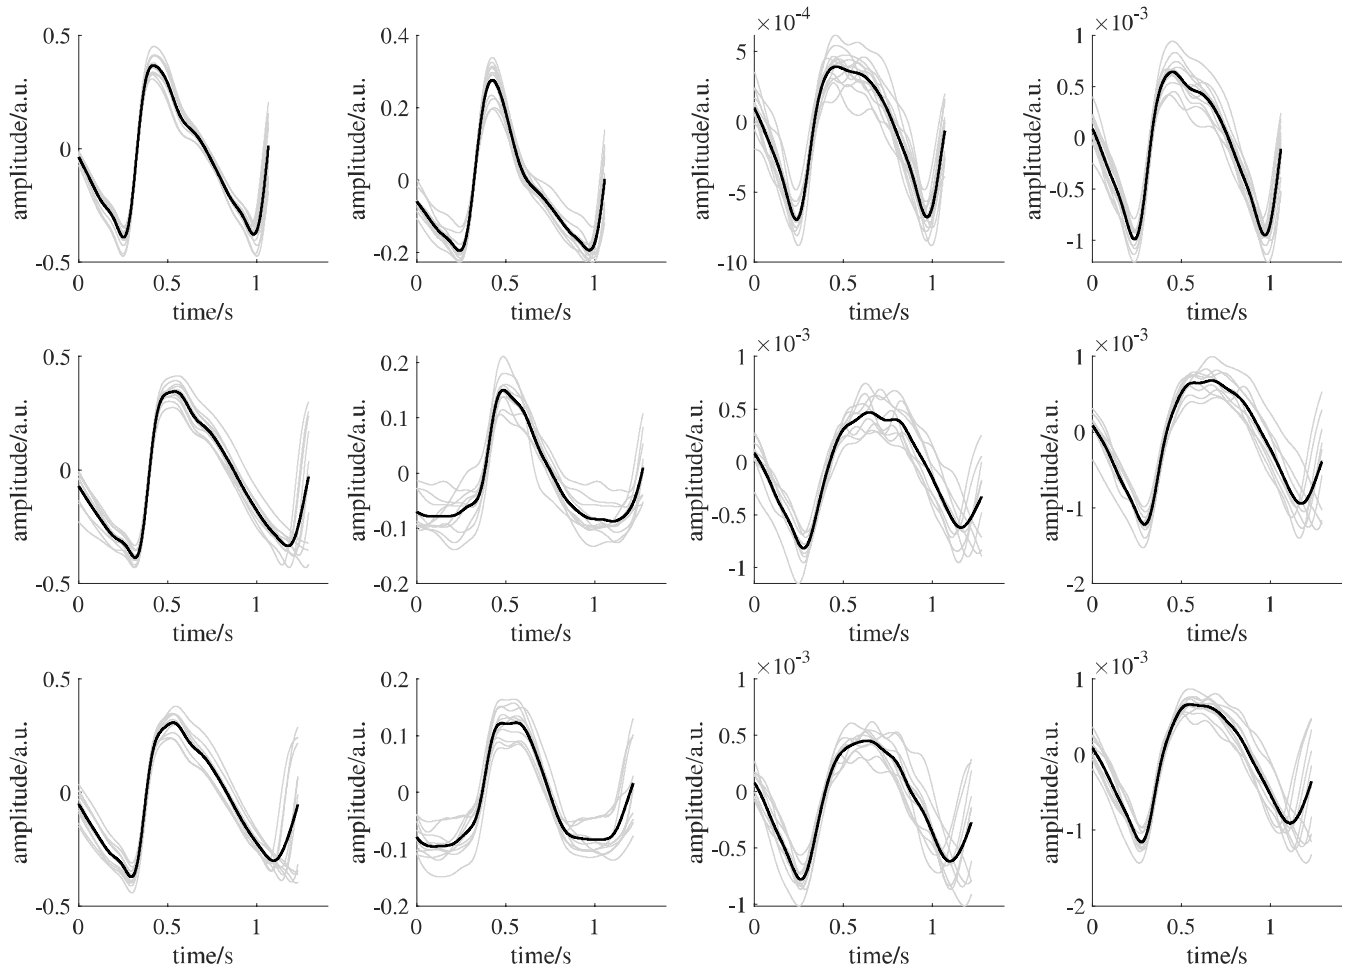

**Figure S8.** Template generation of one subject. From left to right: earlobe PPG (BL: 12 beats, ST1: 10 beats, ST2: 10 beats), finger PPG (BL: 12 beats, ST1: 10 beats, ST2: 10 beats), forehead iPPG (BL: 13 beats, ST1: 9 beats, ST2: 10 beats), super ROI iPPG (BL: 13 beats, ST1: 9 beats, ST2: 10 beats). The upper row shows signals during BL. The middle row shows signals during ST1. The lower row shows signals during ST2. Black lines indicate mean beat templates; gray lines indicate the corresponding beat segments.

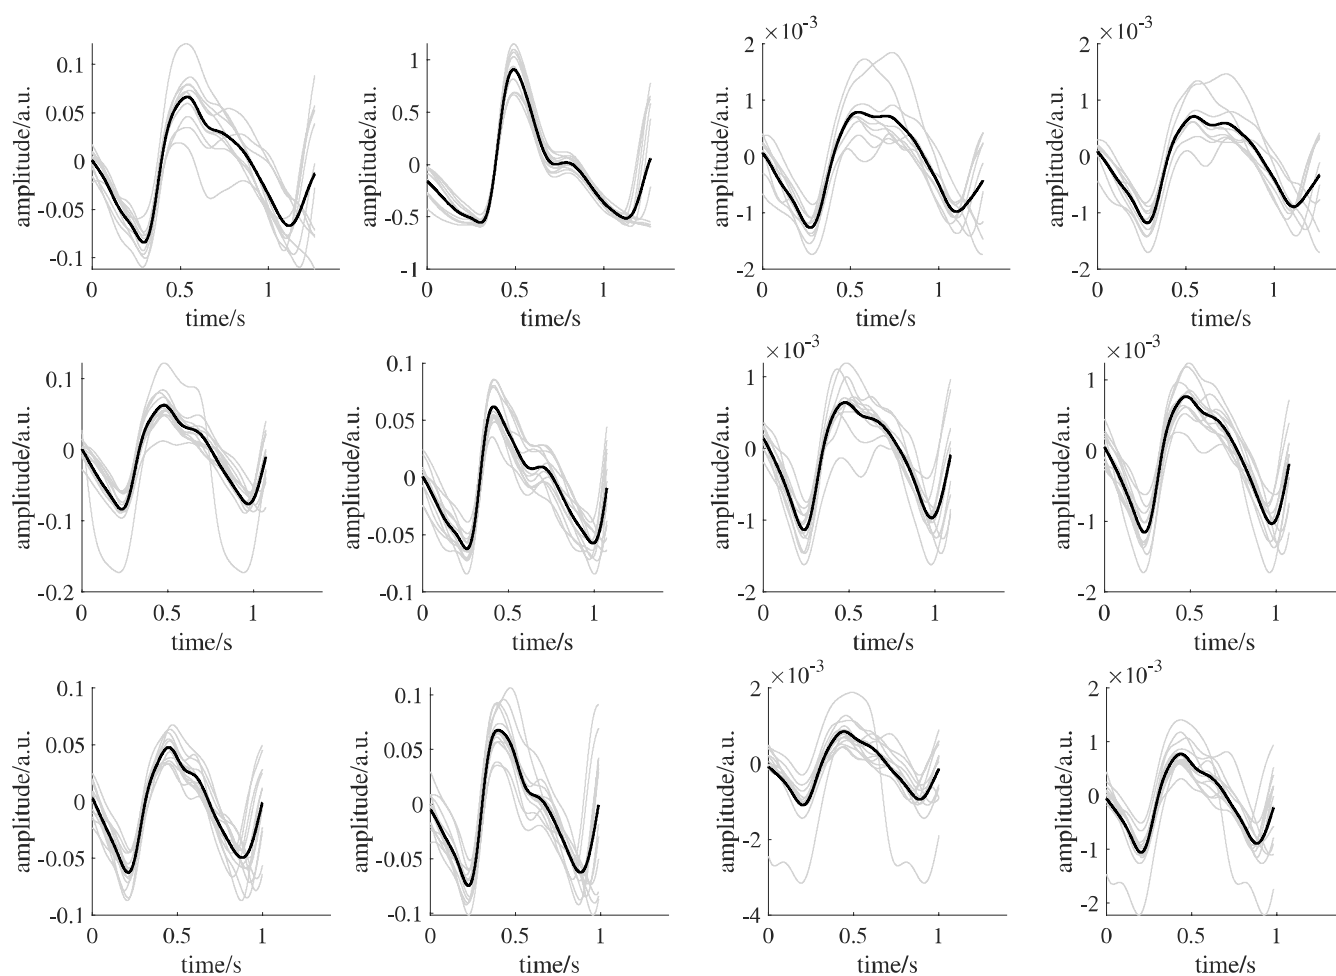

**Figure S9.** Template generation of one subject. From left to right: earlobe PPG (BL: 10 beats, ST1: 12 beats, ST2: 13 beats), finger PPG (BL: 10 beats, ST1: 12 beats, ST2: 13 beats), forehead iPPG (BL: 9 beats, ST1: 12 beats, ST2: 13 beats), super ROI iPPG (BL: 9 beats, ST1: 12 beats, ST2: 13 beats). The upper row shows signals during BL. The middle row shows signals during ST1. The lower row shows signals during ST2. Black lines indicate mean beat templates; gray lines indicate the corresponding beat segments.

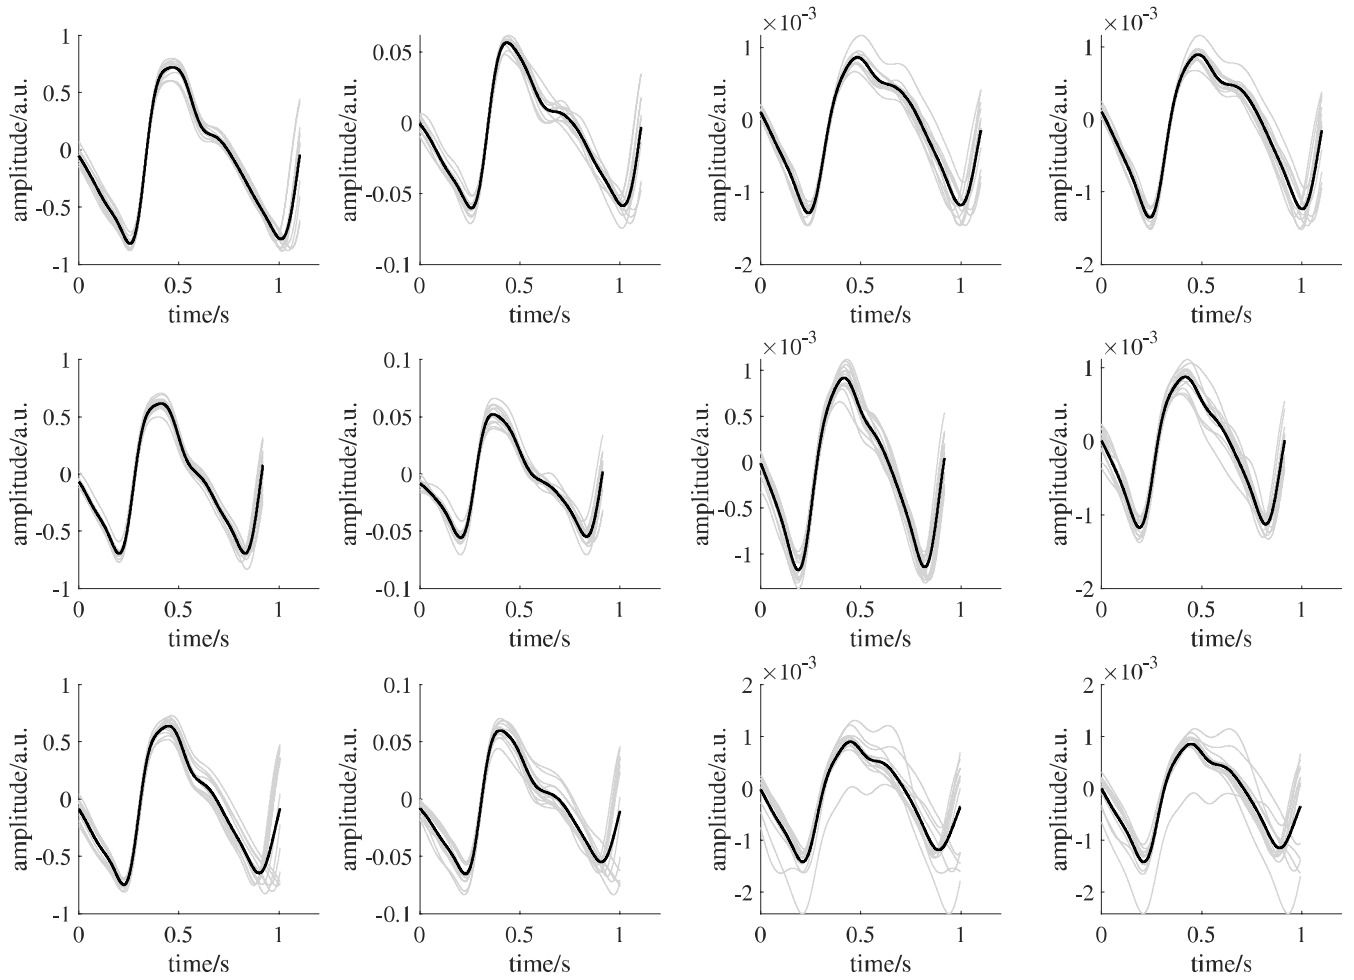

**Figure S10.** Template generation of one subject. From left to right: earlobe PPG (BL: 11 beats, ST1: 14 beats, ST2: 13 beats), finger PPG (BL: 11 beats, ST1: 14 beats, ST2: 13 beats), forehead iPPG (BL: 12 beats, ST1: 14 beats, ST2: 13 beats), super ROI iPPG (BL: 12 beats, ST1: 14 beats, ST2: 13 beats). The upper row shows signals during BL. The middle row shows signals during ST1. The lower row shows signals during ST2. Black lines indicate mean beat templates; gray lines indicate the corresponding beat segments.

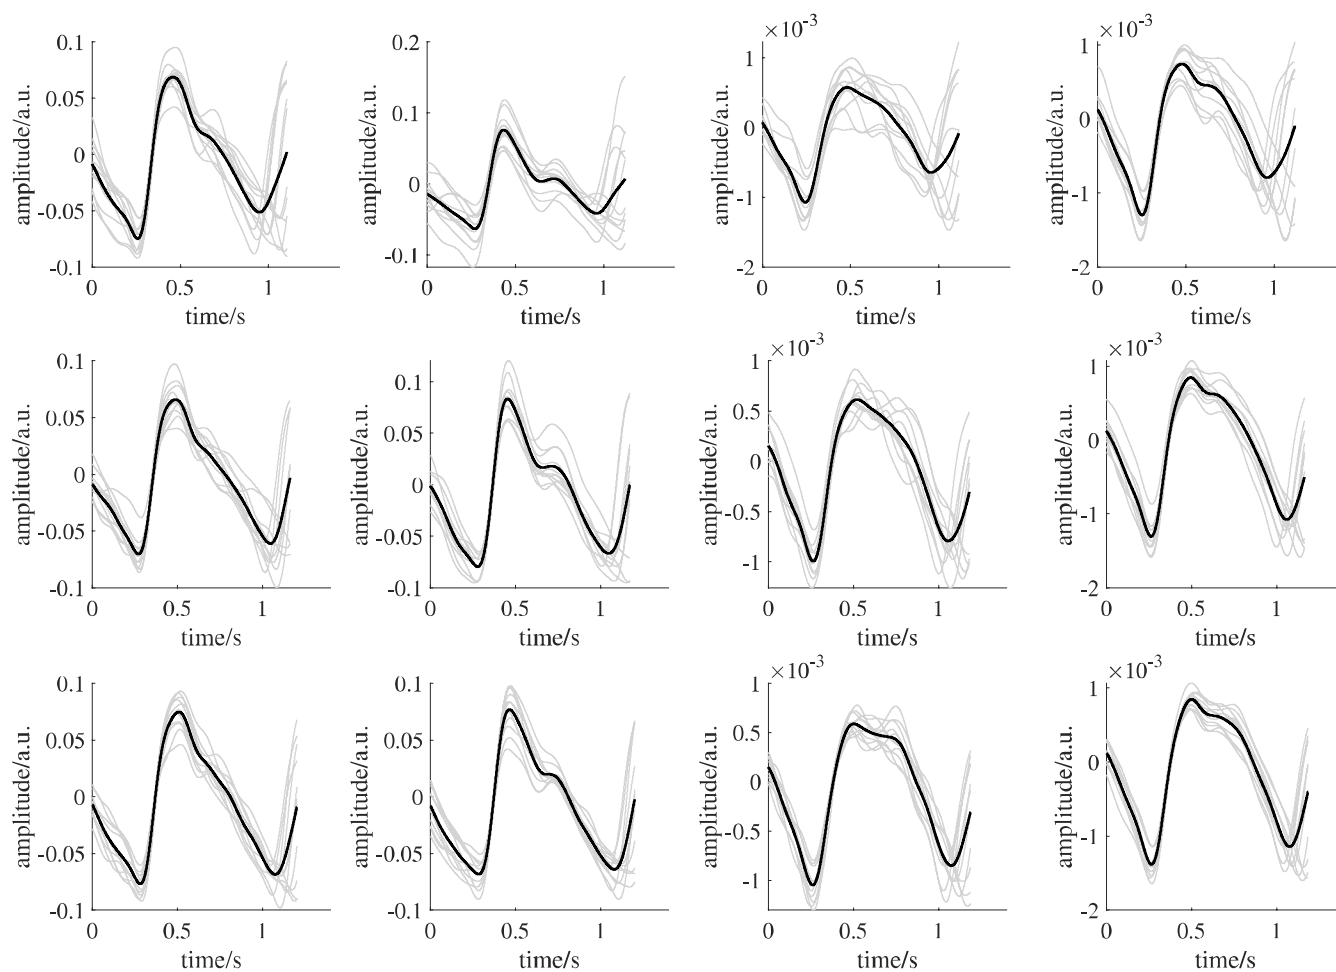

**Figure S11.** Template generation of one subject. From left to right: earlobe PPG (BL: 12 beats, ST1: 11 beats, ST2: 11 beats), finger PPG (BL: 12 beats, ST1: 11 beats, ST2: 11 beats), forehead iPPG (BL: 11 beats, ST1: 11 beats, ST2: 11 beats), super ROI iPPG (BL: 11 beats, ST1: 11 beats, ST2: 11 beats). The upper row shows signals during BL. The middle row shows signals during ST1. The lower row shows signals during ST2. Black lines indicate mean beat templates; gray lines indicate the corresponding beat segments.

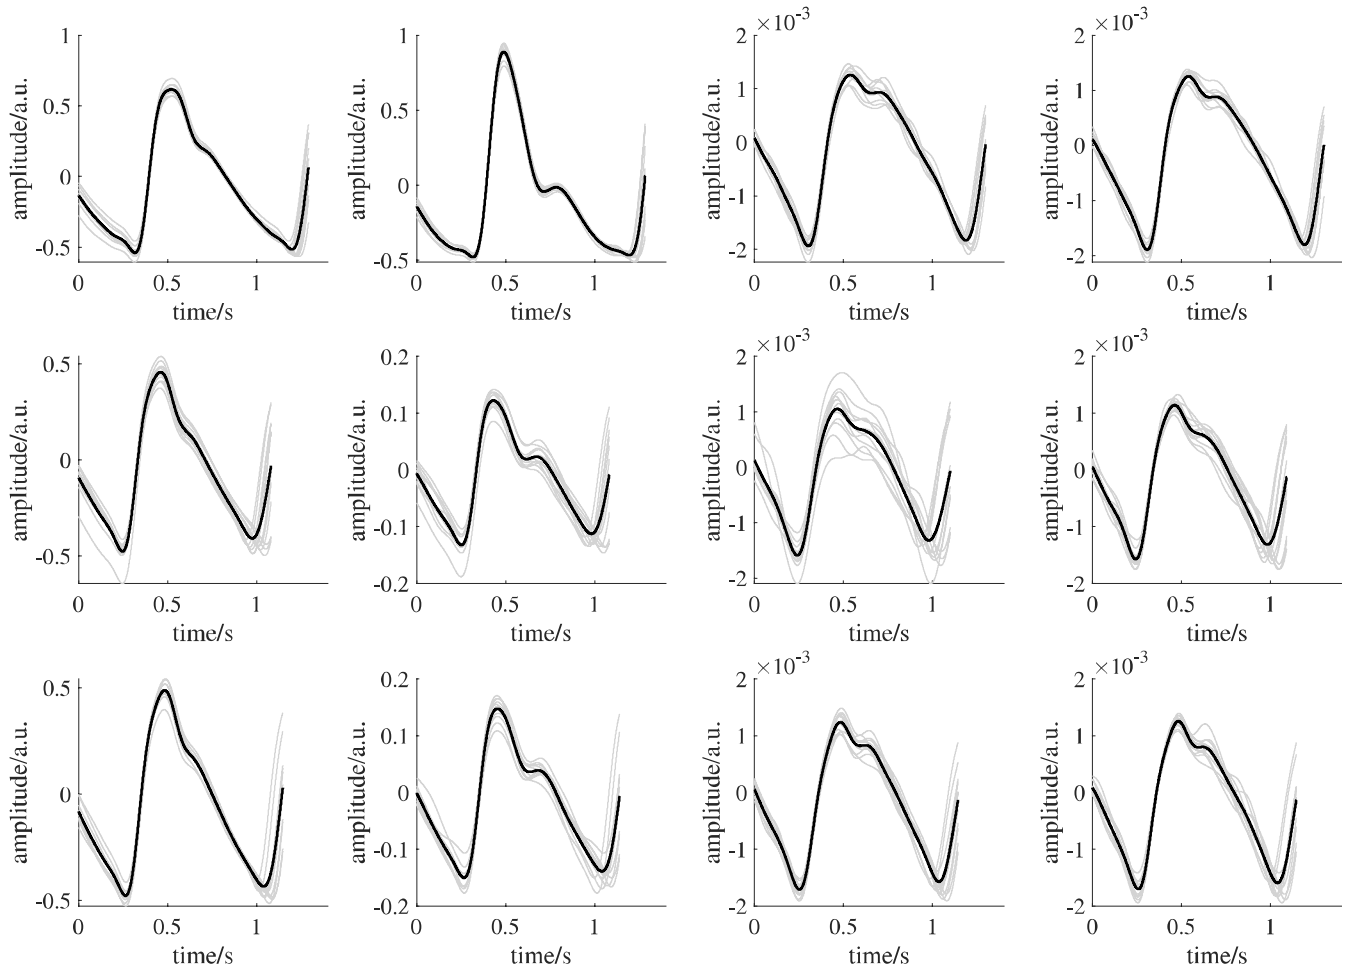

**Figure S12.** Template generation of one subject. From left to right: earlobe PPG (BL: 10 beats, ST1: 12 beats, ST2: 11 beats), finger PPG (BL: 10 beats, ST1: 12 beats, ST2: 11 beats), forehead iPPG (BL: 10 beats, ST1: 12 beats, ST2: 12 beats), super ROI iPPG (BL: 10 beats, ST1: 12 beats, ST2: 12 beats). The upper row shows signals during BL. The middle row shows signals during ST1. The lower row shows signals during ST2. Black lines indicate mean beat templates; gray lines indicate the corresponding beat segments.



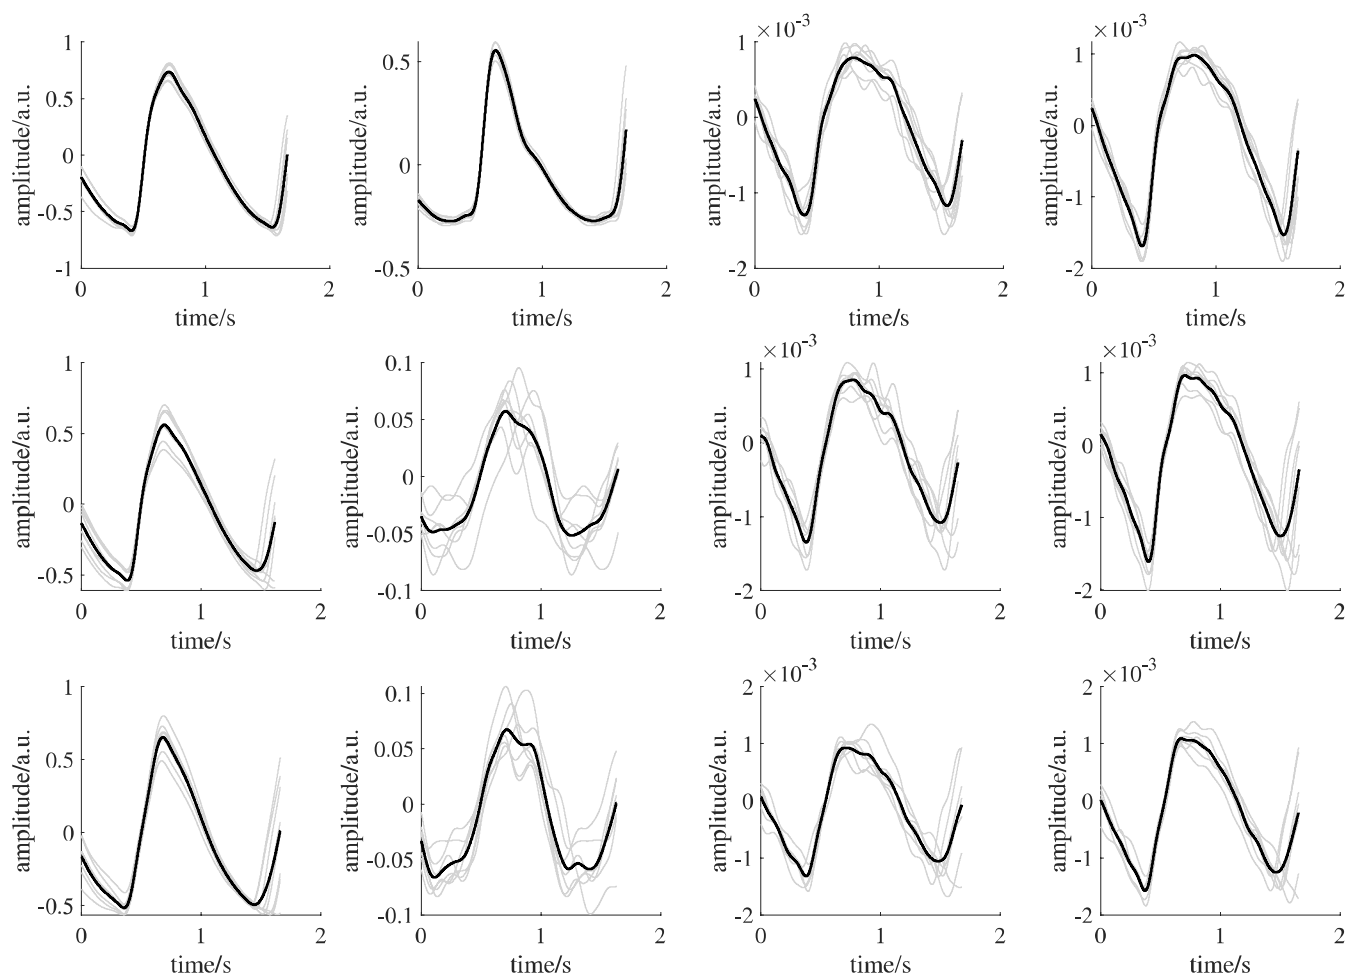

**Figure S13.** Template generation of one subject. From left to right: earlobe PPG (BL: 7 beats, ST1: 8 beats, ST2: 8 beats), finger PPG (BL: 7 beats, ST1: 8 beats, ST2: 7 beats), forehead iPPG (BL: 8 beats, ST1: 8 beats, ST2: 7 beats), super ROI iPPG (BL: 8 beats, ST1: 8 beats, ST2: 7 beats). The upper row shows signals during BL. The middle row shows signals during ST1. The lower row shows signals during ST2. Black lines indicate mean beat templates; gray lines indicate the corresponding beat segments.

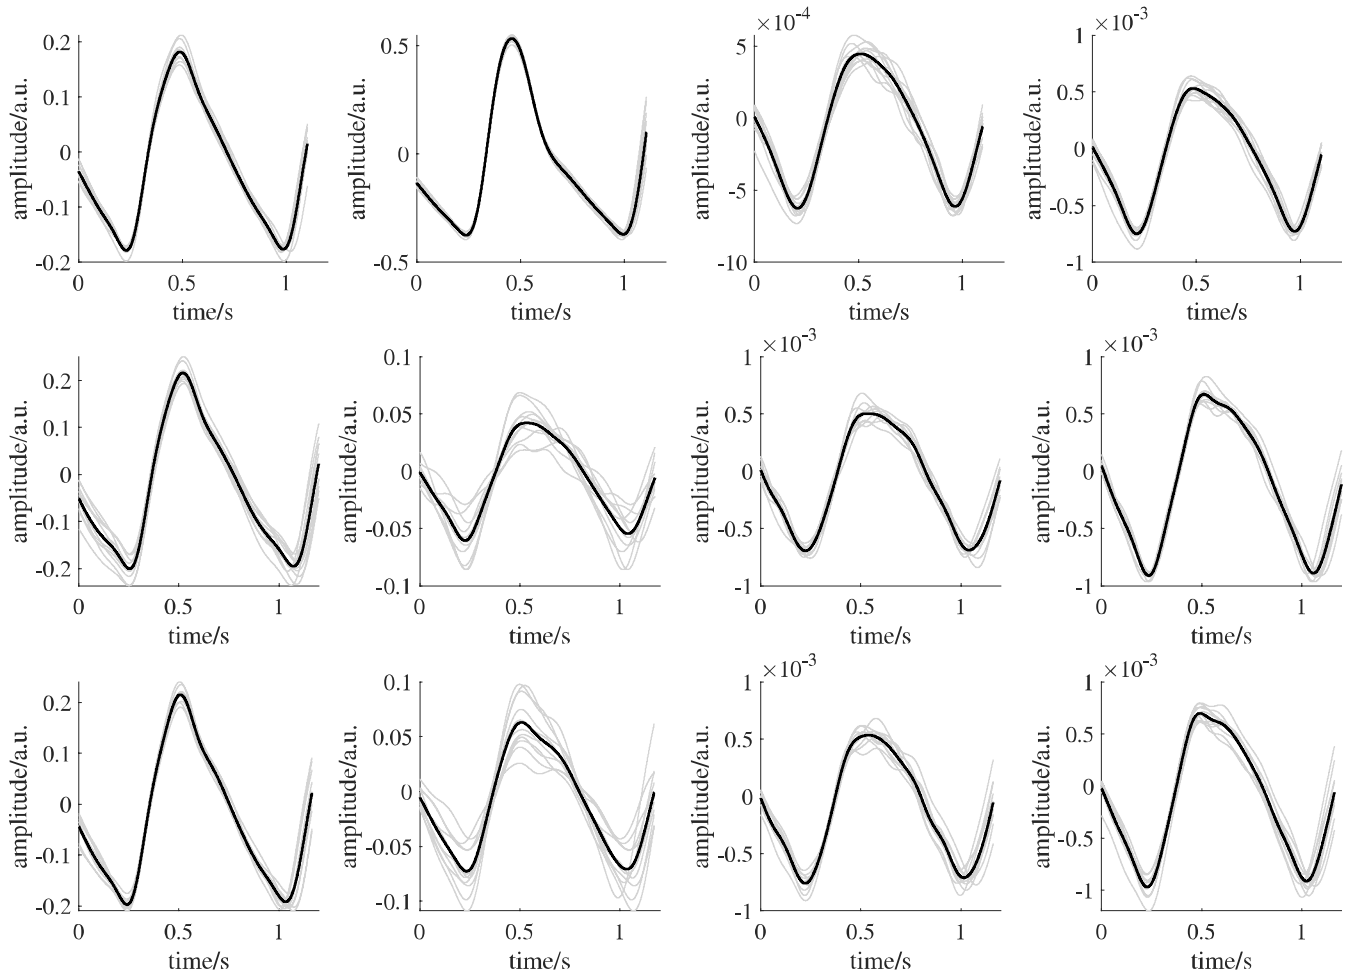

**Figure S14.** Template generation of one subject. From left to right: earlobe PPG (BL: 11 beats, ST1: 11 beats, ST2: 11 beats), finger PPG (BL: 11 beats, ST1: 11 beats, ST2: 11 beats), forehead iPPG (BL: 12 beats, ST1: 11 beats, ST2: 11 beats), super ROI iPPG (BL: 12 beats, ST1: 10 beats, ST2: 11 beats). The upper row shows signals during BL. The middle row shows signals during ST1. The lower row shows signals during ST2. Black lines indicate mean beat templates; gray lines indicate the corresponding beat segments.

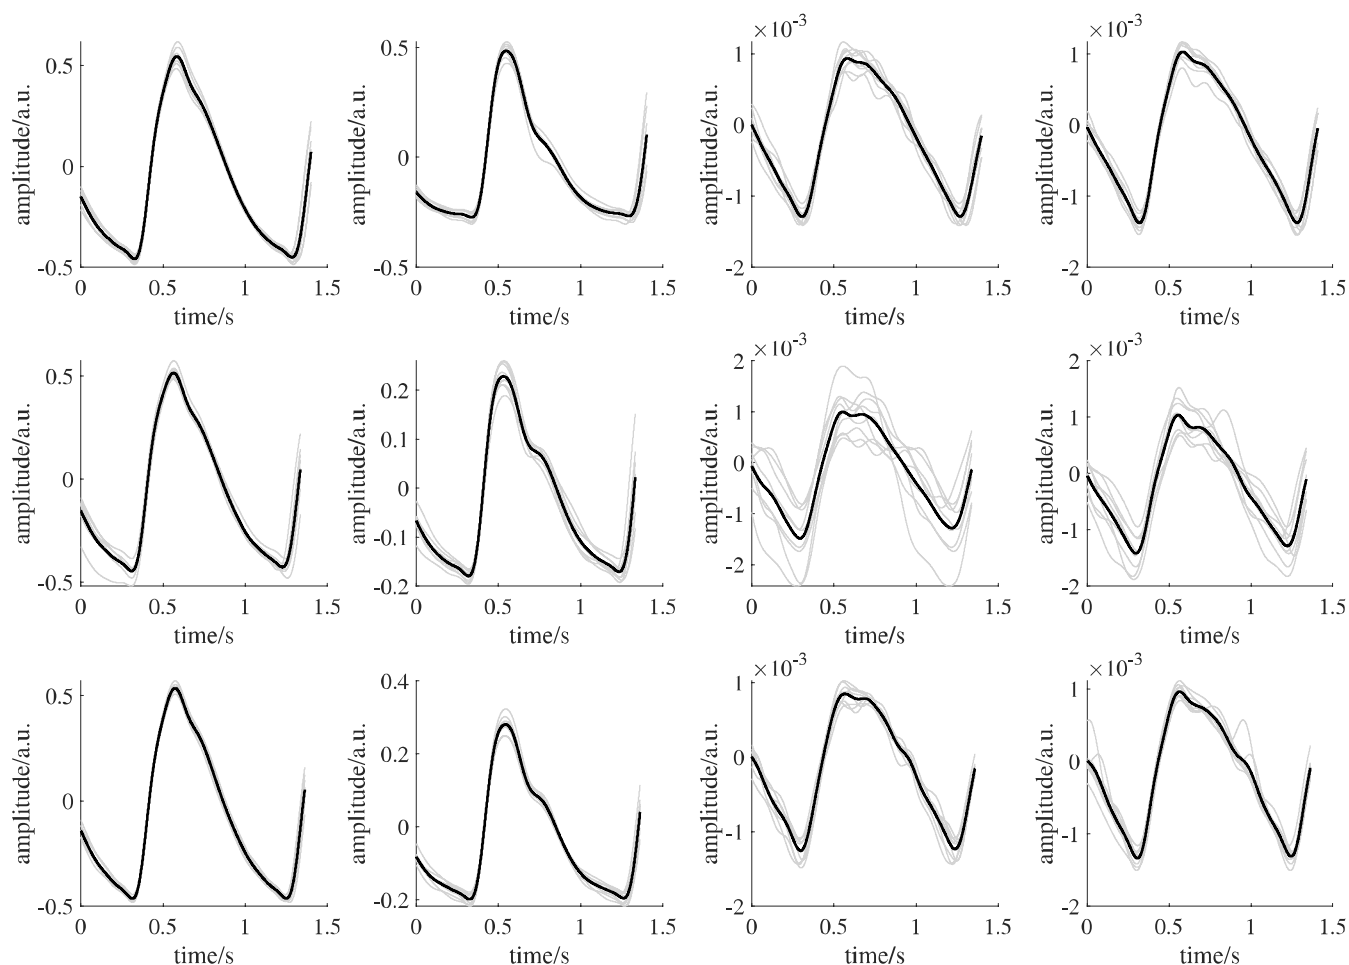

**Figure S15.** Template generation of one subject. From left to right: earlobe PPG (BL: 9 beats, ST1: 9 beats, ST2: 9 beats), finger PPG (BL: 9 beats, ST1: 9 beats, ST2: 9 beats), forehead iPPG (BL: 9 beats, ST1: 9 beats, ST2: 9 beats), super ROI iPPG (BL: 9 beats, ST1: 9 beats, ST2: 9 beats). The upper row shows signals during BL. The middle row shows signals during ST1. The lower row shows signals during ST2. Black lines indicate mean beat templates; gray lines indicate the corresponding beat segments.

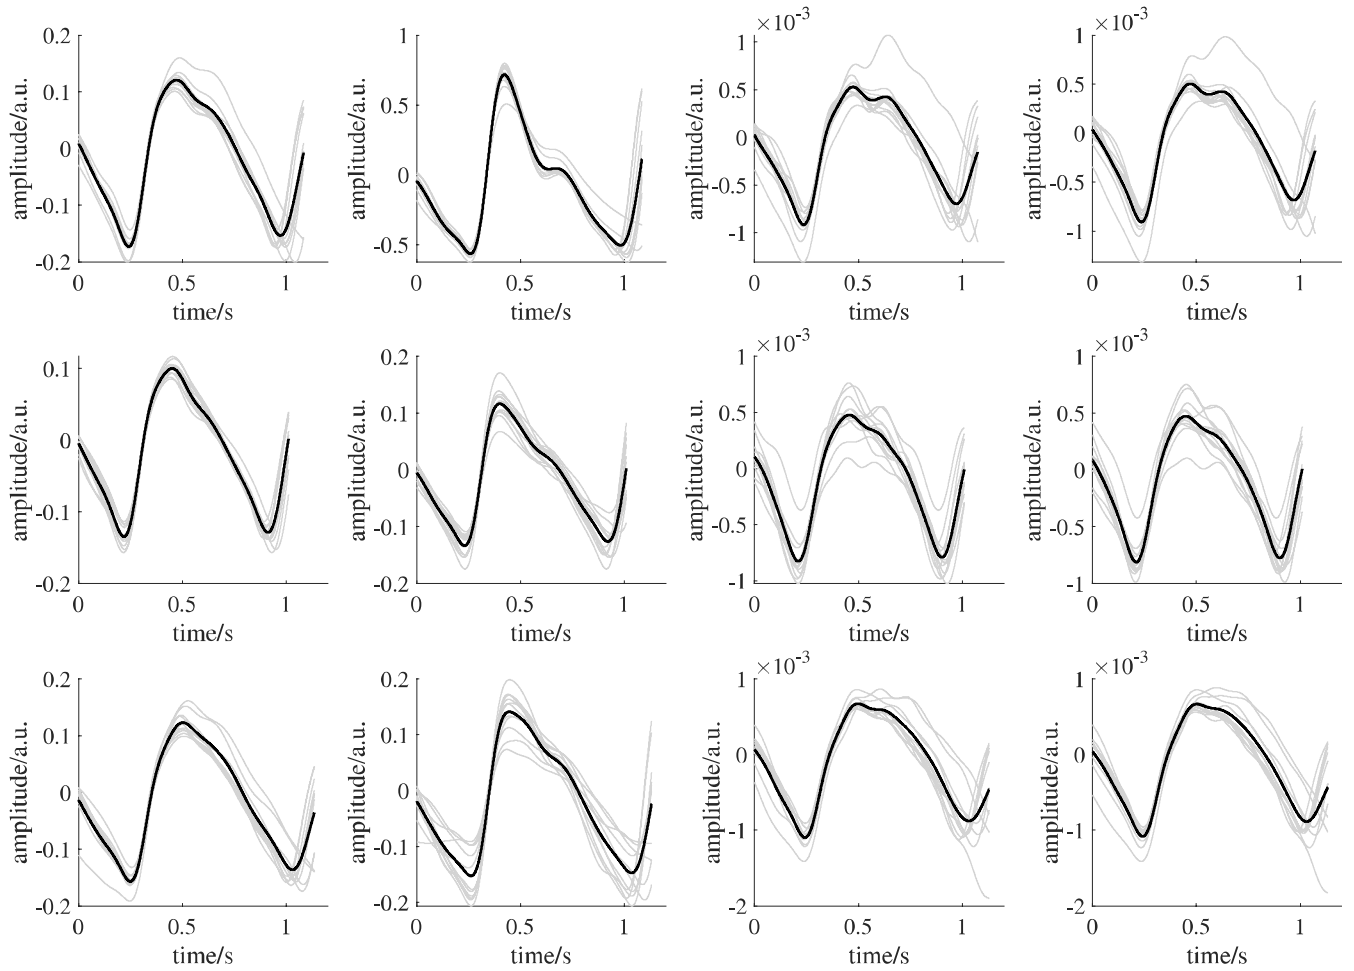

**Figure S16.** Template generation of one subject. From left to right: earlobe PPG (BL: 11 beats, ST1: 13 beats, ST2: 11 beats), finger PPG (BL: 11 beats, ST1: 13 beats, ST2: 11 beats), forehead iPPG (BL: 12 beats, ST1: 13 beats, ST2: 11 beats), super ROI iPPG (BL: 12 beats, ST1: 13 beats, ST2: 11 beats). The upper row shows signals during BL. The middle row shows signals during ST1. The lower row shows signals during ST2. Black lines indicate mean beat templates; gray lines indicate the corresponding beat segments.

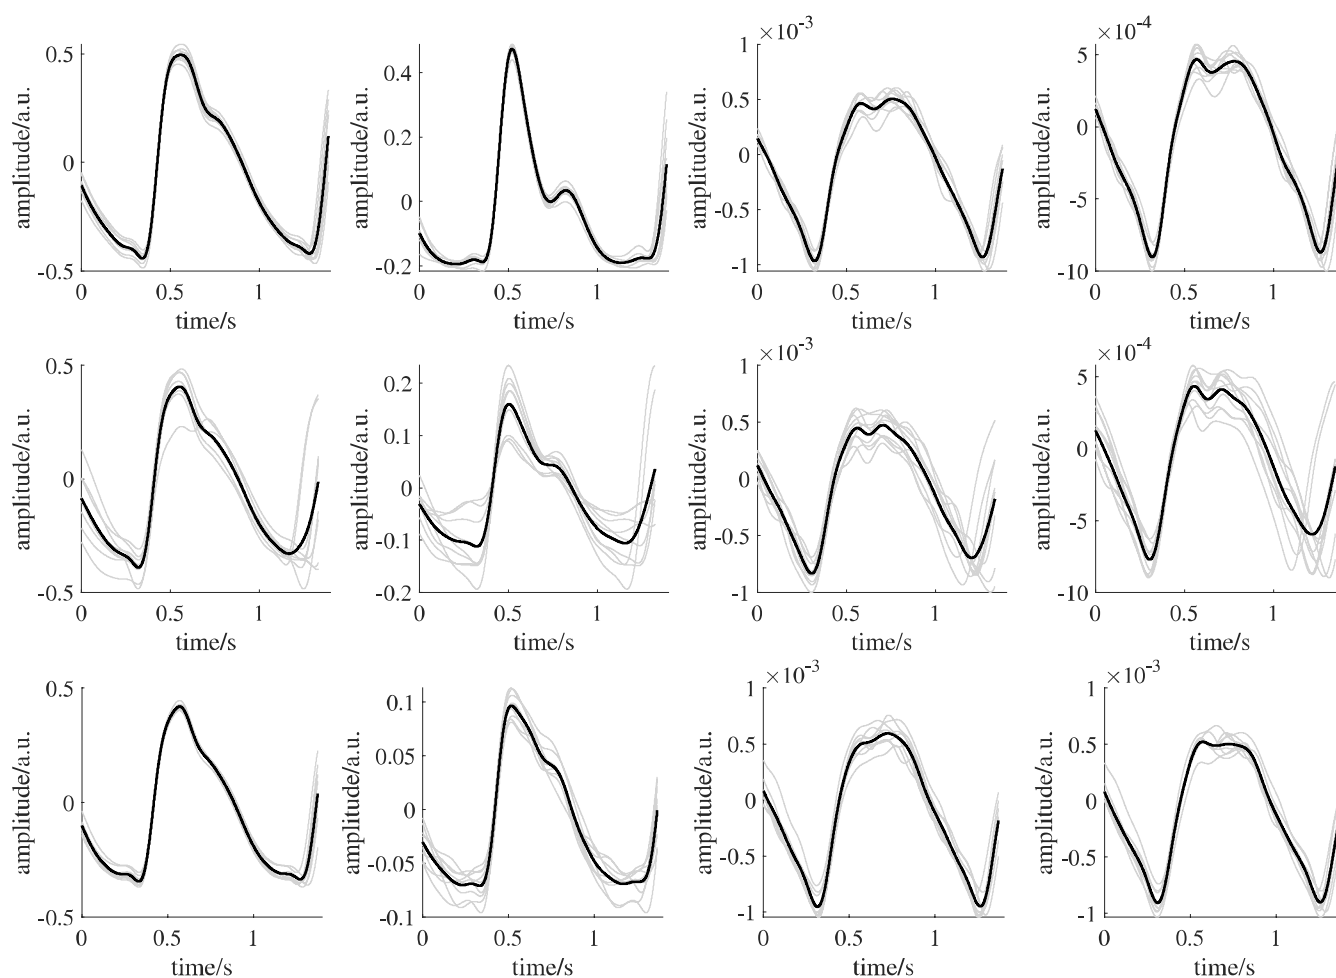

**Figure S17.** Template generation of one subject. From left to right: earlobe PPG (BL: 9 beats, ST1: 9 beats, ST2: 9 beats), finger PPG (BL: 9 beats, ST1: 9 beats, ST2: 9 beats), forehead iPPG (BL: 9 beats, ST1: 10 beats, ST2: 9 beats), super ROI iPPG (BL: 9 beats, ST1: 10 beats, ST2: 9 beats). The upper row shows signals during BL. The middle row shows signals during ST1. The lower row shows signals during ST2. Black lines indicate mean beat templates; gray lines indicate the corresponding beat segments.

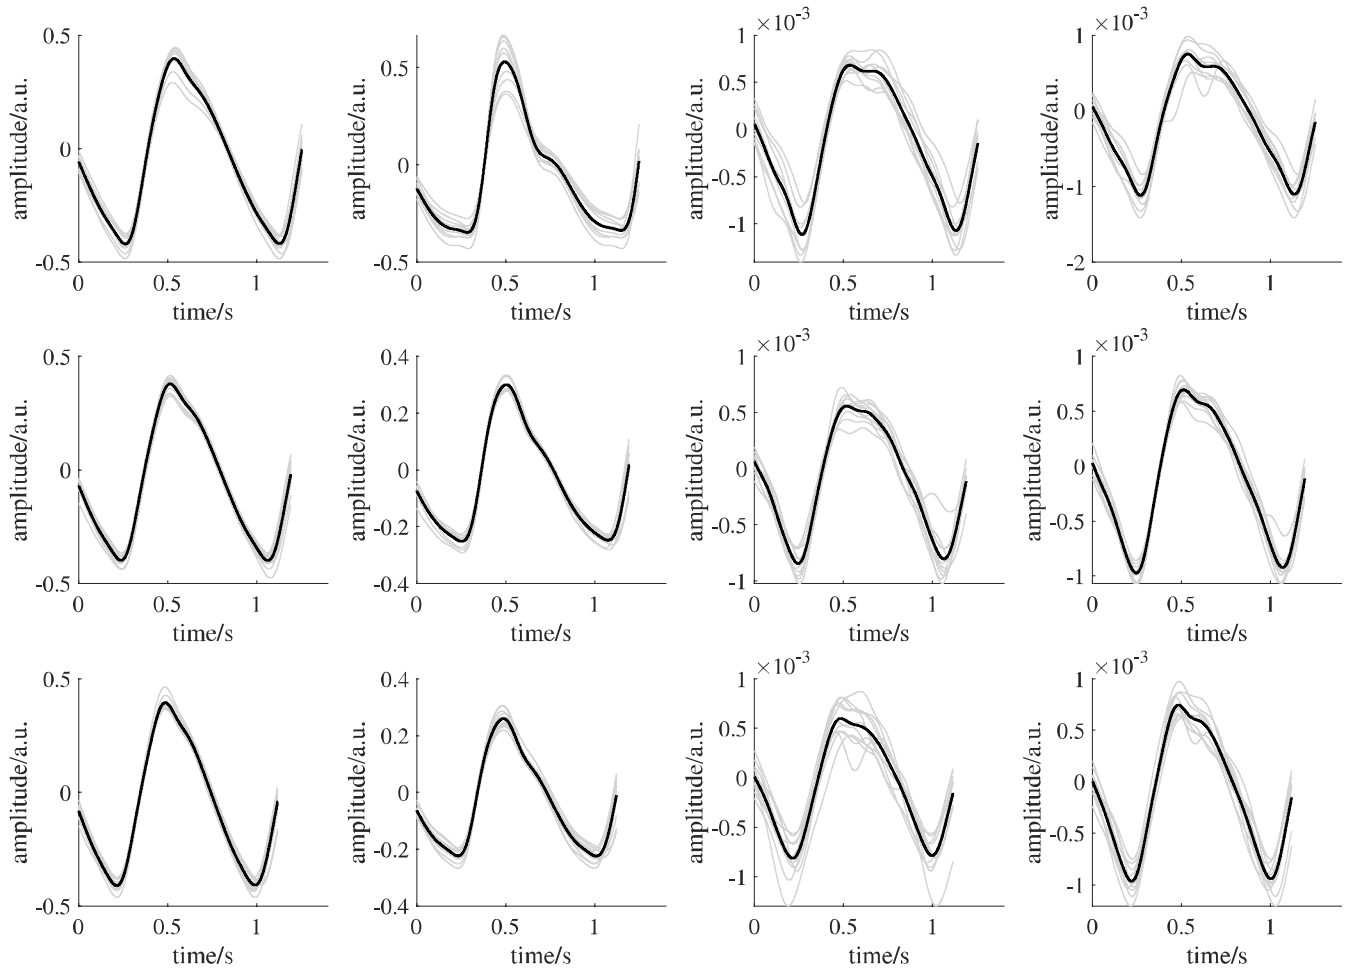

**Figure S18.** Template generation of one subject. From left to right: earlobe PPG (BL: 10 beats, ST1: 11 beats, ST2: 11 beats), finger PPG (BL: 10 beats, ST1: 11 beats, ST2: 12 beats), forehead iPPG (BL: 10 beats, ST1: 11 beats, ST2: 11 beats), super ROI iPPG (BL: 10 beats, ST1: 10 beats, ST2: 11 beats). The upper row shows signals during BL. The middle row shows signals during ST1. The lower row shows signals during ST2. Black lines indicate mean beat templates; gray lines indicate the corresponding beat segments.

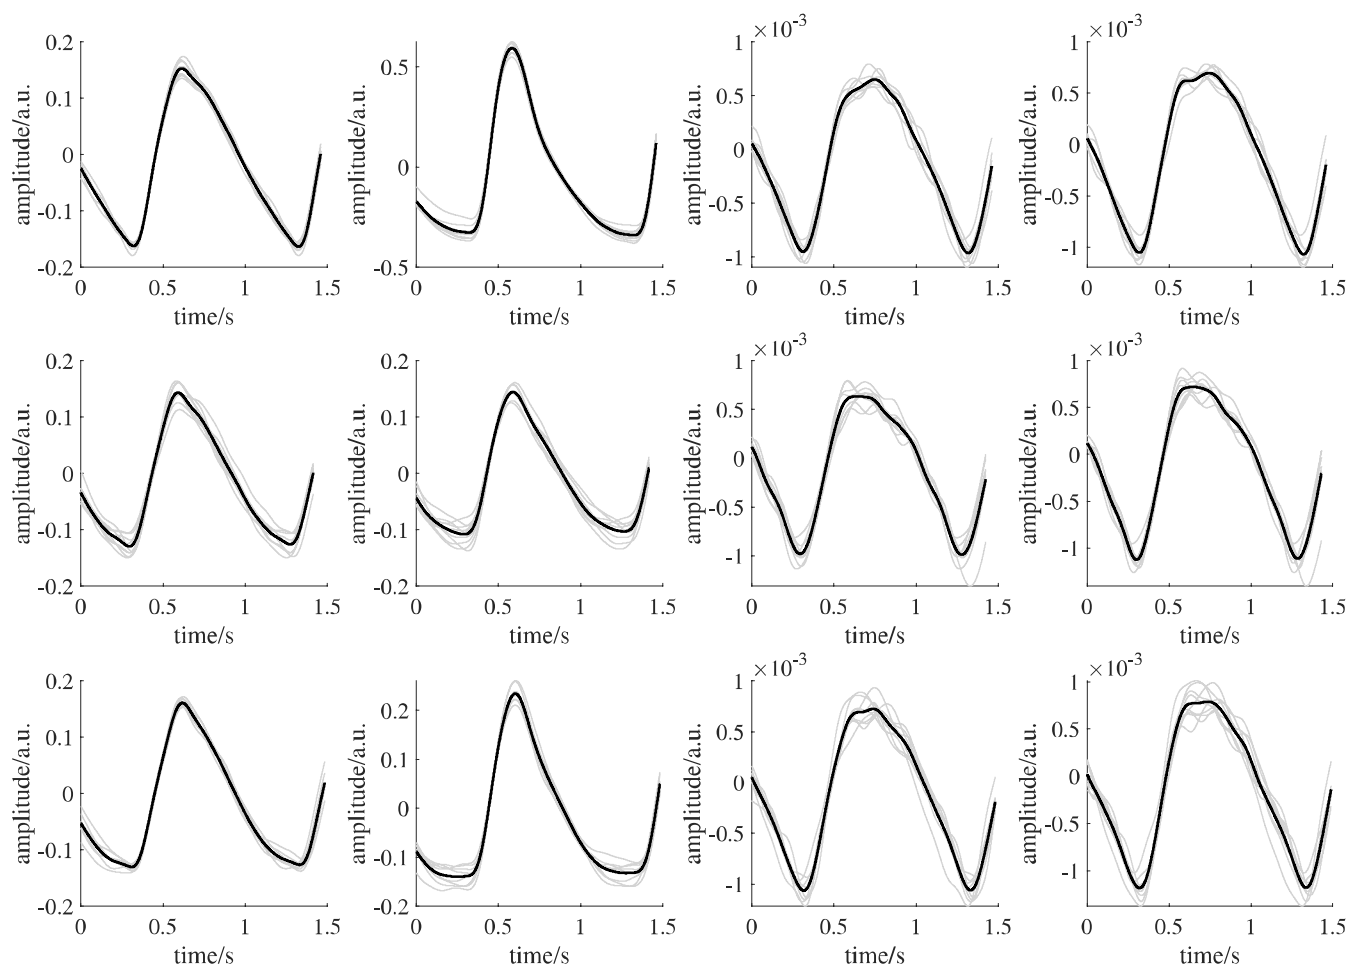

**Figure S19.** Template generation of one subject. From left to right: earlobe PPG (BL: 9 beats, ST1: 9 beats, ST2: 8 beats), finger PPG (BL: 9 beats, ST1: 9 beats, ST2: 8 beats), forehead iPPG (BL: 8 beats, ST1: 9 beats, ST2: 9 beats), super ROI iPPG (BL: 8 beats, ST1: 9 beats, ST2: 9 beats). The upper row shows signals during BL. The middle row shows signals during ST1. The lower row shows signals during ST2. Black lines indicate mean beat templates; gray lines indicate the corresponding beat segments.

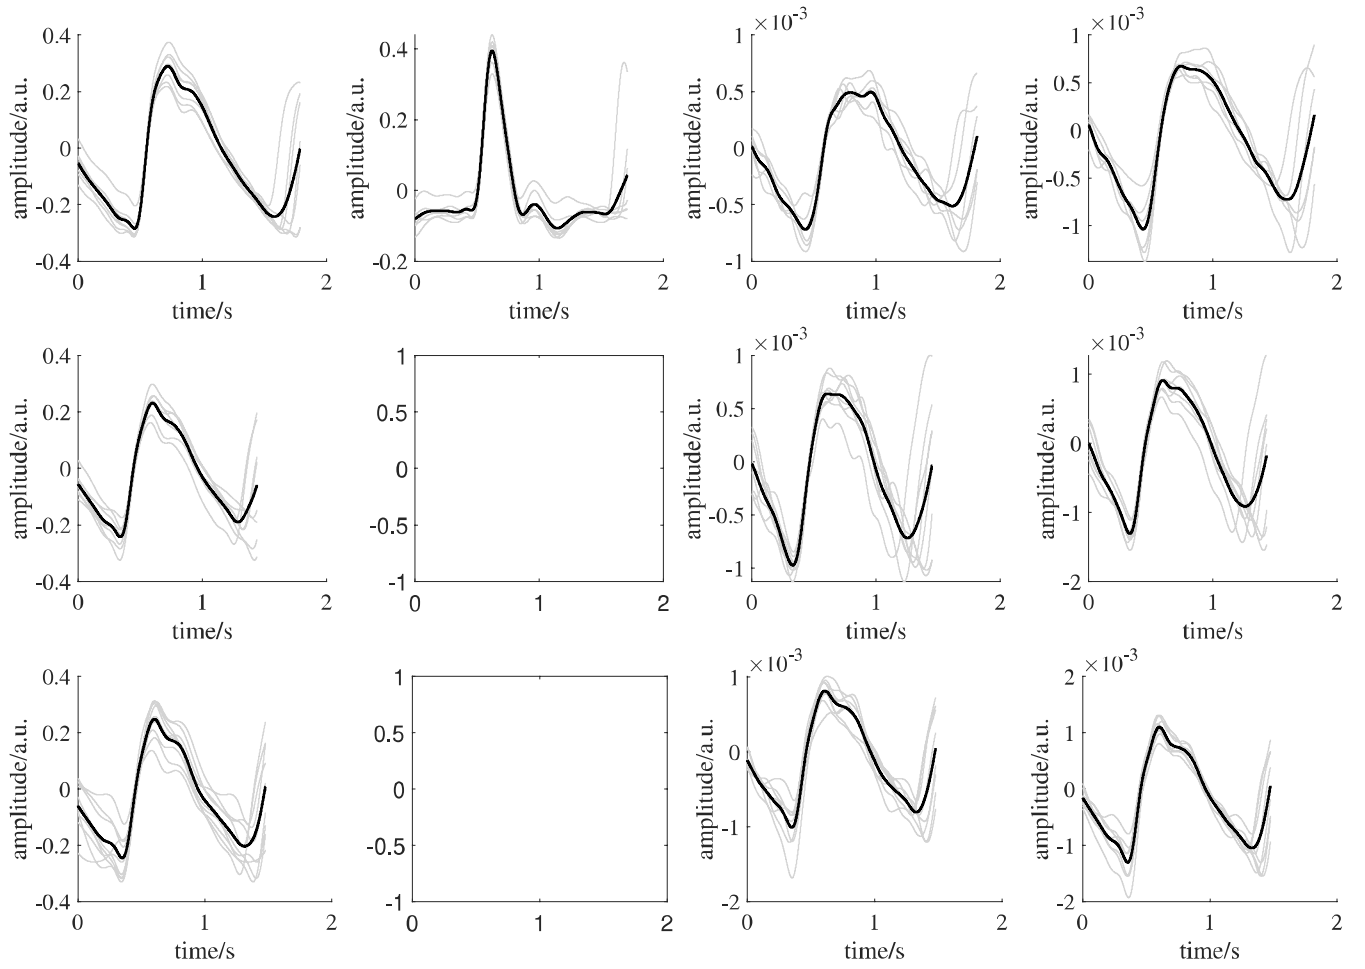

**Figure S20.** Template generation of one subject. From left to right: earlobe PPG (BL: 7 beats, ST1: 8 beats, ST2: 9 beats), finger PPG (BL: 7 beats, ST1: 4 beats, ST2: 0 beats), forehead iPPG (BL: 6 beats, ST1: 8 beats, ST2: 8 beats), super ROI iPPG (BL: 6 beats, ST1: 8 beats, ST2: 8 beats). The upper row shows signals during BL. The middle row shows signals during ST1. The lower row shows signals during ST2. Black lines indicate mean beat templates; gray lines indicate the corresponding beat segments.



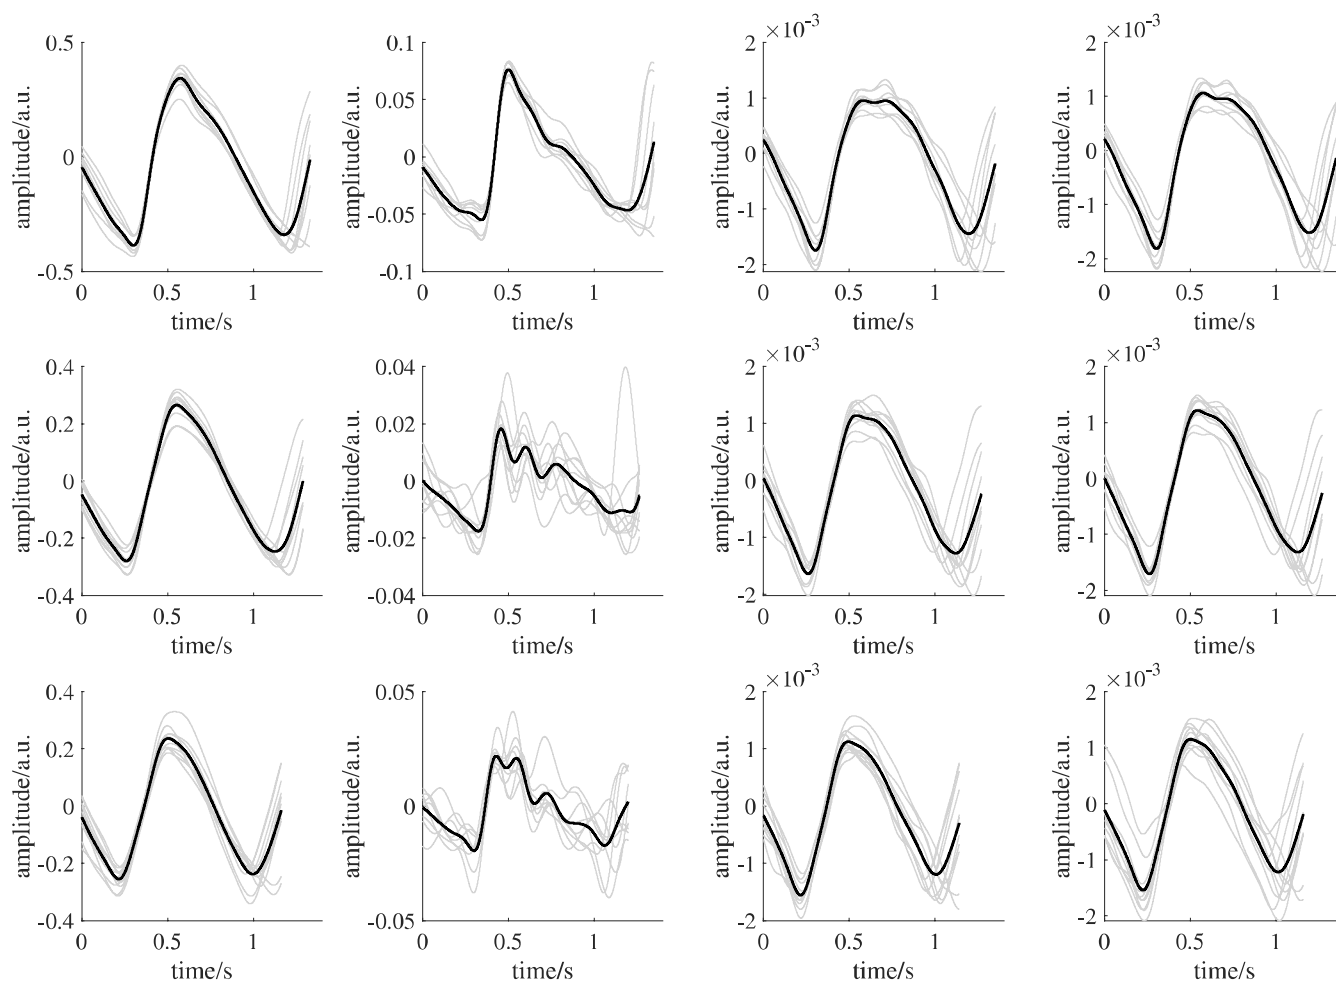

**Figure S21.** Template generation of one subject. From left to right: earlobe PPG (BL: 9 beats, ST1: 10 beats, ST2: 11 beats), finger PPG (BL: 9 beats, ST1: 10 beats, ST2: 9 beats), forehead iPPG (BL: 9 beats, ST1: 10 beats, ST2: 11 beats), super ROI iPPG (BL: 9 beats, ST1: 10 beats, ST2: 11 beats). The upper row shows signals during BL. The middle row shows signals during ST1. The lower row shows signals during ST2. Black lines indicate mean beat templates; gray lines indicate the corresponding beat segments.

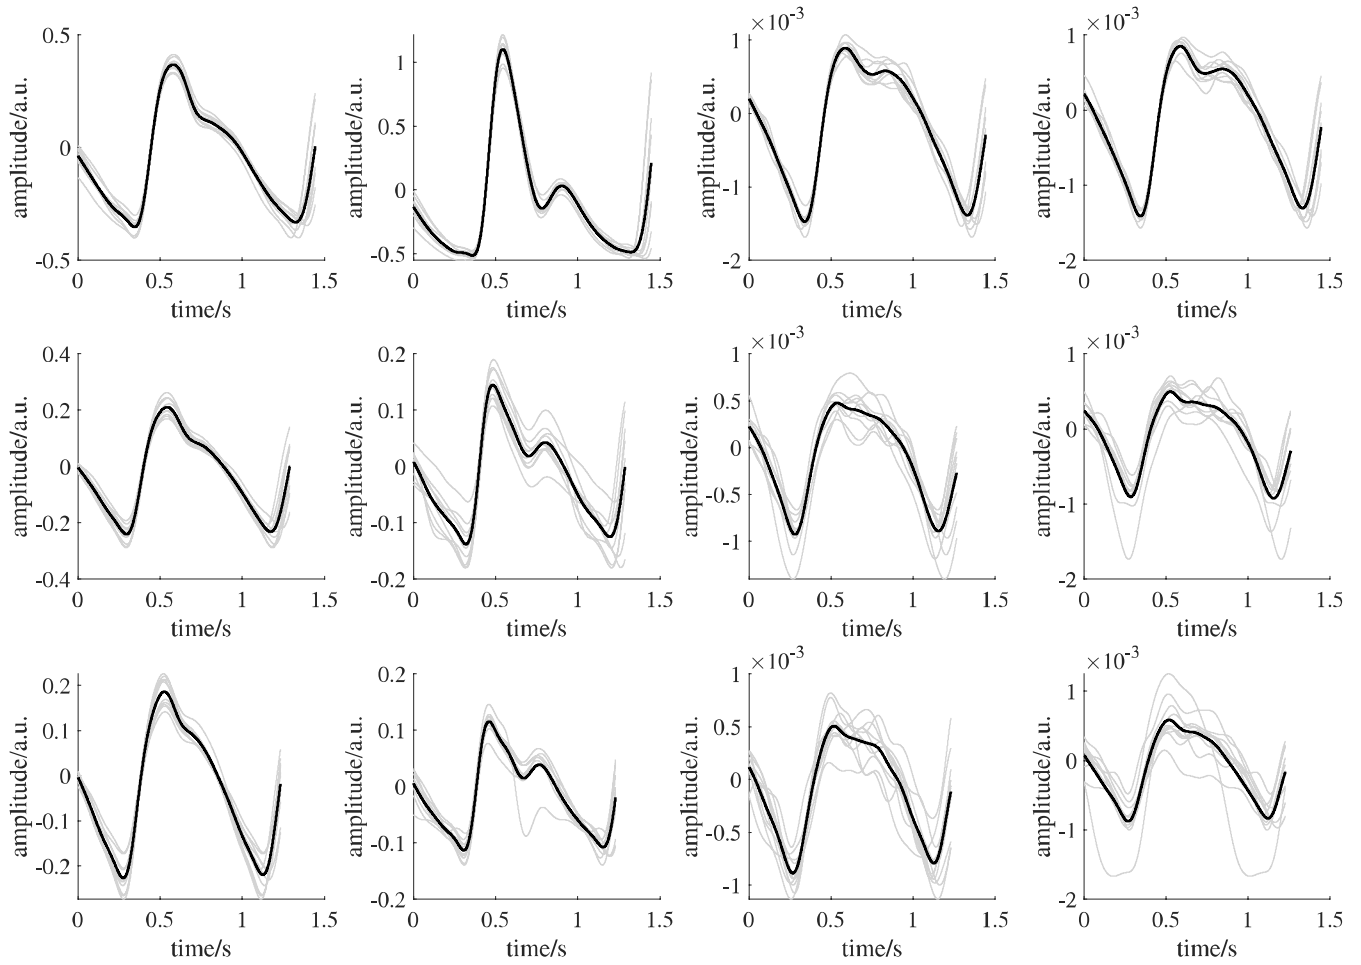

**Figure S22.** Template generation of one subject. From left to right: earlobe PPG (BL: 9 beats, ST1: 10 beats, ST2: 10 beats), finger PPG (BL: 9 beats, ST1: 10 beats, ST2: 10 beats), forehead iPPG (BL: 9 beats, ST1: 10 beats, ST2: 11 beats), super ROI iPPG (BL: 9 beats, ST1: 10 beats, ST2: 11 beats). The upper row shows signals during BL. The middle row shows signals during ST1. The lower row shows signals during ST2. Black lines indicate mean beat templates; gray lines indicate the corresponding beat segments.

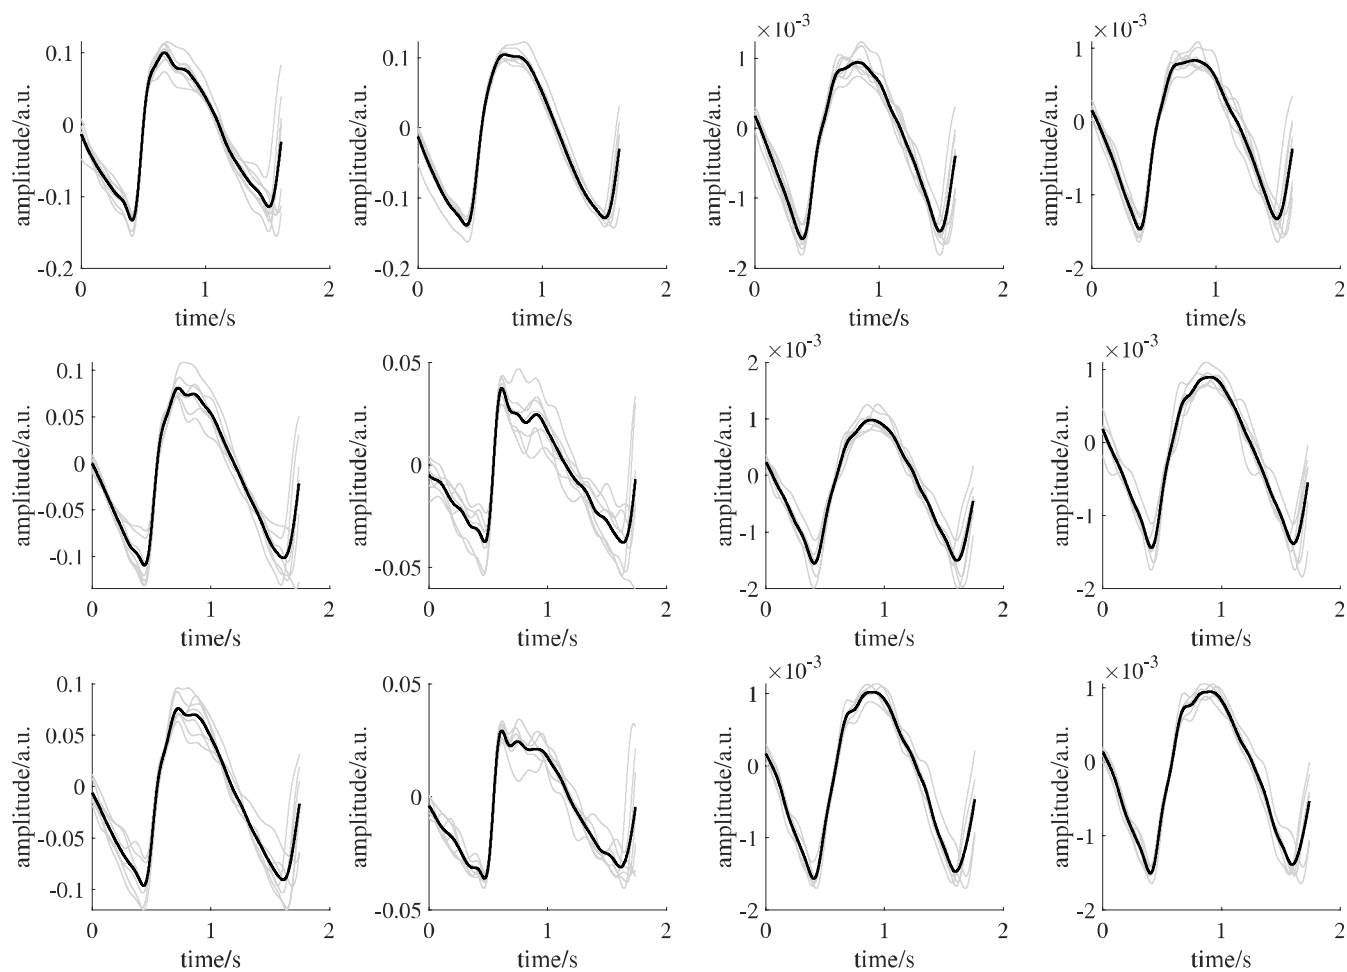

**Figure S23.** Template generation of one subject. From left to right: earlobe PPG (BL: 8 beats, ST1: 7 beats, ST2: 7 beats), finger PPG (BL: 7 beats, ST1: 7 beats, ST2: 7 beats), forehead iPPG (BL: 8 beats, ST1: 7 beats, ST2: 6 beats), super ROI iPPG (BL: 8 beats, ST1: 7 beats, ST2: 6 beats). The upper row shows signals during BL. The middle row shows signals during ST1. The lower row shows signals during ST2. Black lines indicate mean beat templates; gray lines indicate the corresponding beat segments.

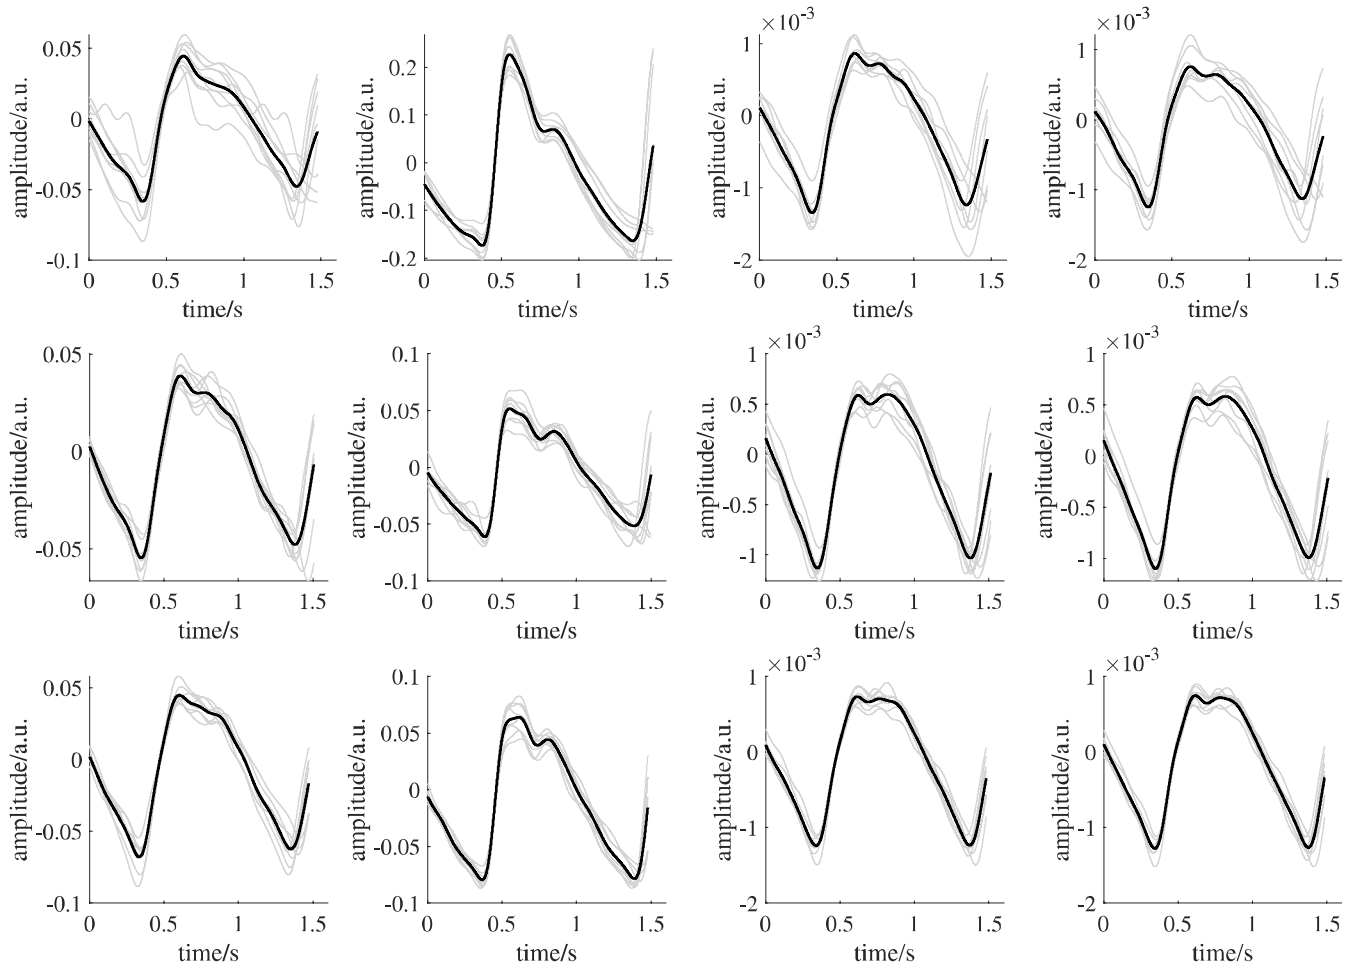

**Figure S24.** Template generation of one subject. From left to right: earlobe PPG (BL: 9 beats, ST1: 9 beats, ST2: 8 beats), finger PPG (BL: 8 beats, ST1: 9 beats, ST2: 8 beats), forehead iPPG (BL: 8 beats, ST1: 8 beats, ST2: 8 beats), super ROI iPPG (BL: 8 beats, ST1: 8 beats, ST2: 8 beats). The upper row shows signals during BL. The middle row shows signals during ST1. The lower row shows signals during ST2. Black lines indicate mean beat templates; gray lines indicate the corresponding beat segments.

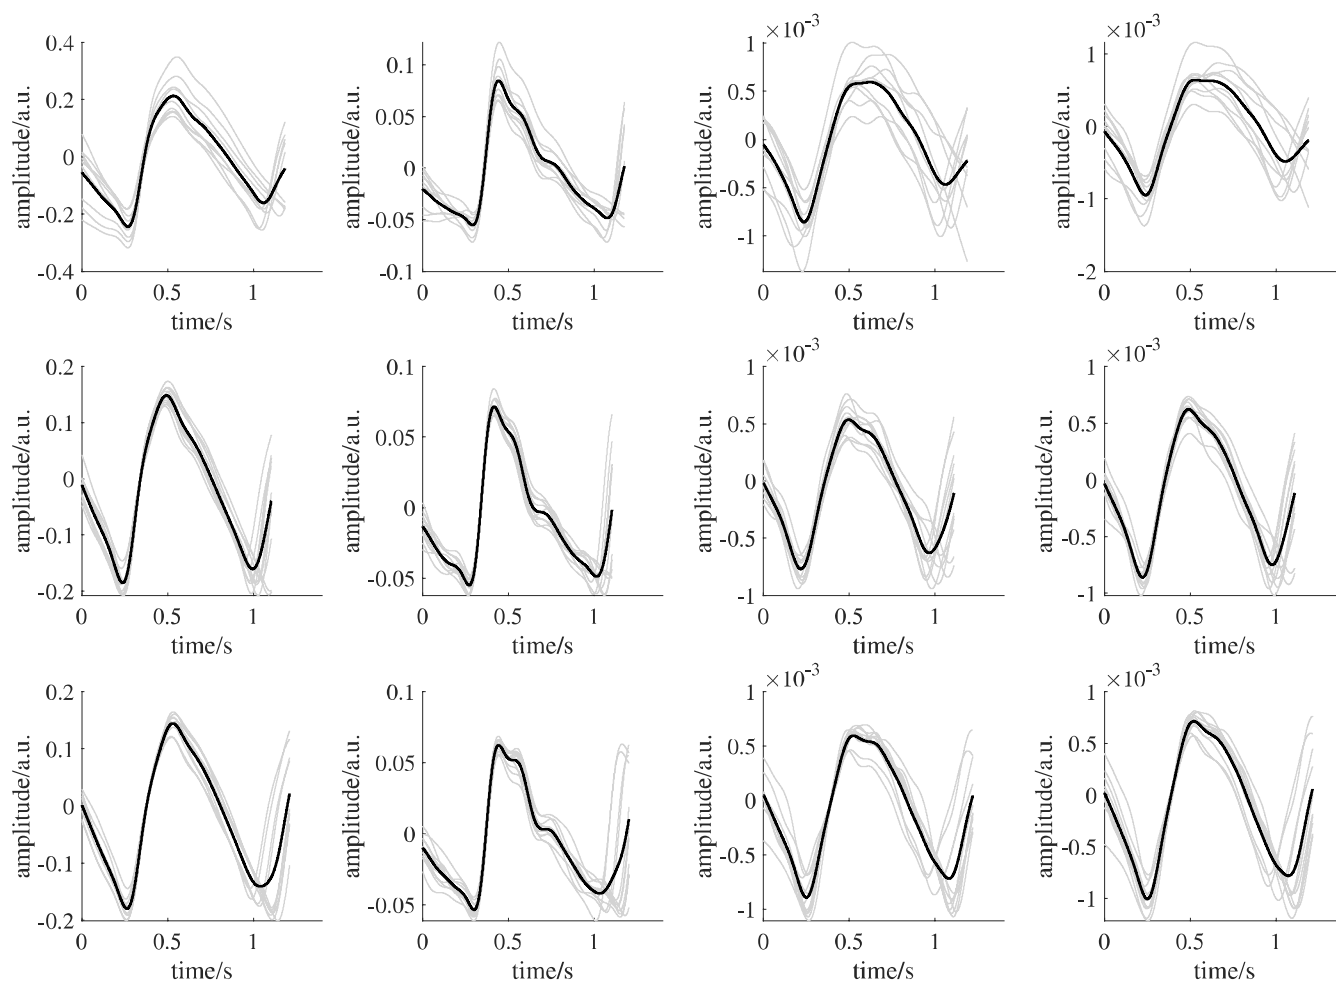

**Figure S25.** Template generation of one subject. From left to right: earlobe PPG (BL: 9 beats, ST1: 11 beats, ST2: 10 beats), finger PPG (BL: 9 beats, ST1: 11 beats, ST2: 11 beats), forehead iPPG (BL: 10 beats, ST1: 12 beats, ST2: 11 beats), super ROI iPPG (BL: 10 beats, ST1: 12 beats, ST2: 11 beats). The upper row shows signals during BL. The middle row shows signals during ST1. The lower row shows signals during ST2. Black lines indicate mean beat templates; gray lines indicate the corresponding beat segments.

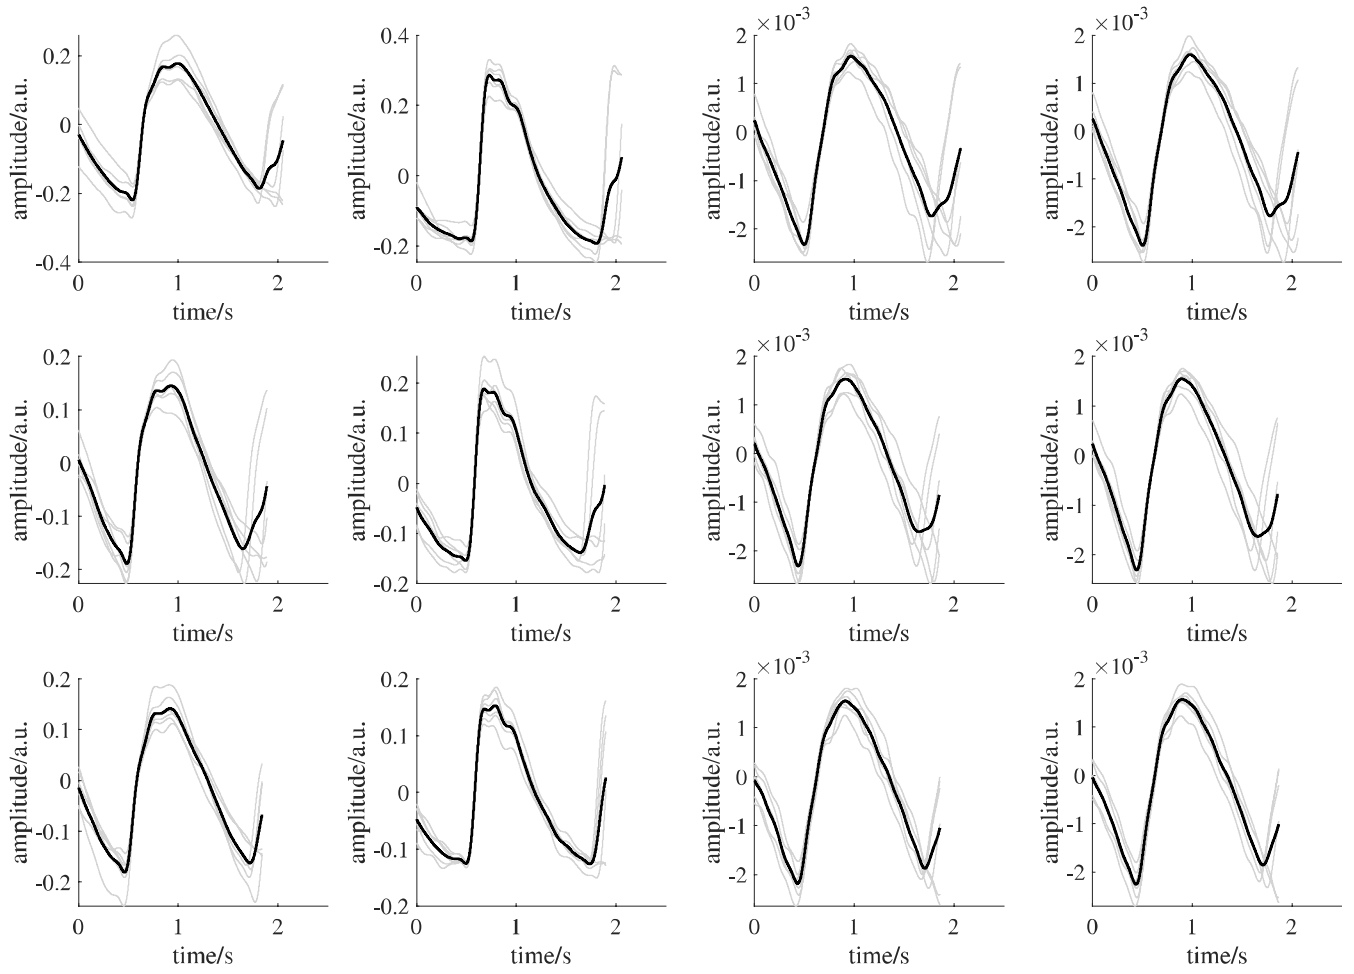

**Figure S26.** Template generation of one subject. From left to right: earlobe PPG (BL: 6 beats, ST1: 6 beats, ST2: 6 beats), finger PPG (BL: 6 beats, ST1: 6 beats, ST2: 6 beats), forehead iPPG (BL: 6 beats, ST1: 6 beats, ST2: 6 beats), super ROI iPPG (BL: 6 beats, ST1: 6 beats, ST2: 6 beats). The upper row shows signals during BL. The middle row shows signals during ST1. The lower row shows signals during ST2. Black lines indicate mean beat templates; gray lines indicate the corresponding beat segments.

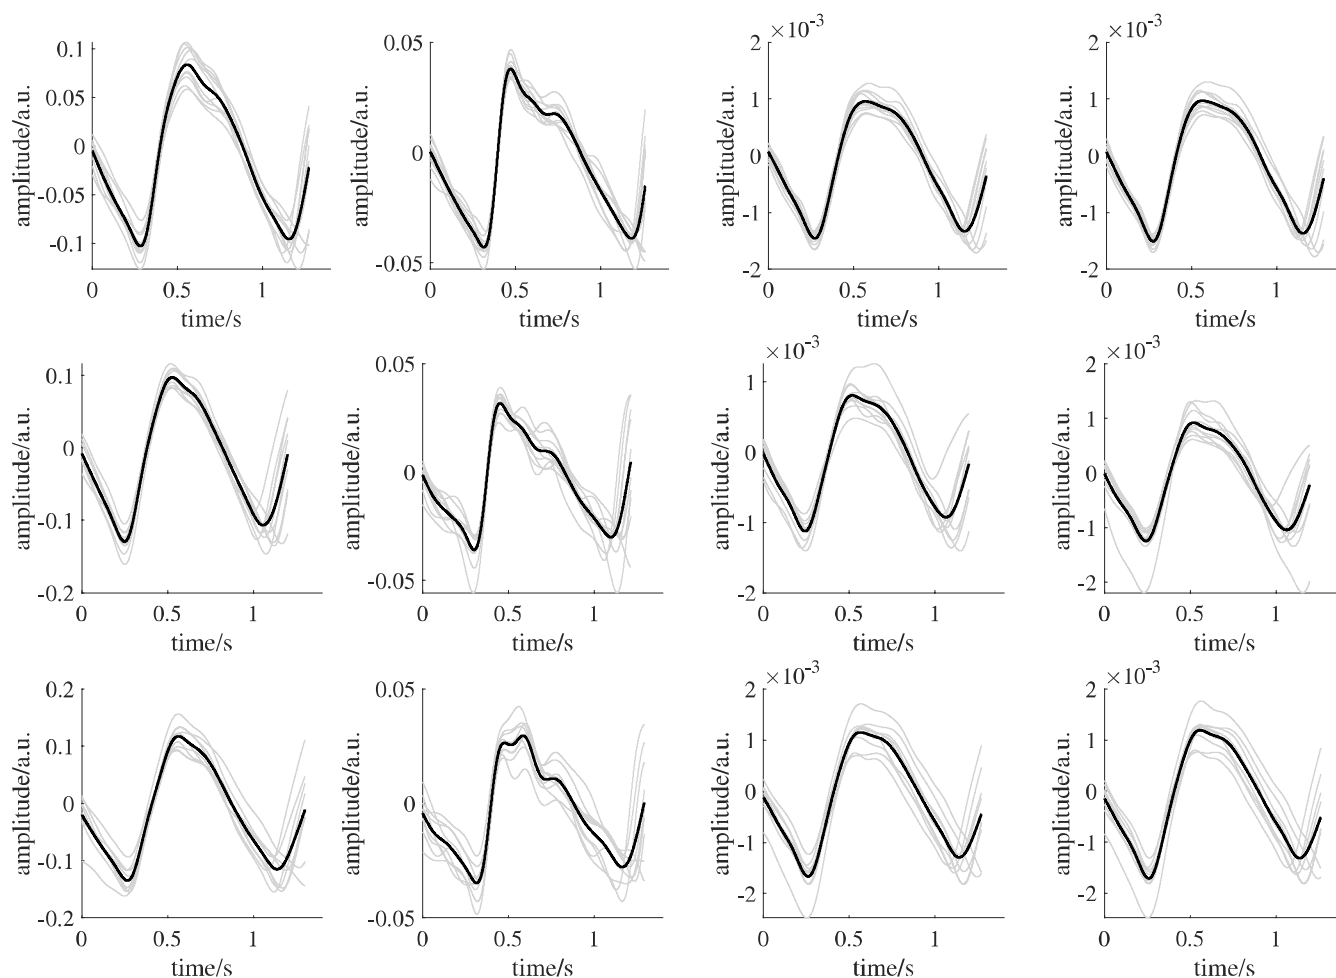

**Figure S27.** Template generation of one subject. From left to right: earlobe PPG (BL: 10 beats, ST1: 10 beats, ST2: 9 beats), finger PPG (BL: 10 beats, ST1: 10 beats, ST2: 9 beats), forehead iPPG (BL: 10 beats, ST1: 10 beats, ST2: 9 beats), super ROI iPPG (BL: 10 beats, ST1: 10 beats, ST2: 9 beats). The upper row shows signals during BL. The middle row shows signals during ST1. The lower row shows signals during ST2. Black lines indicate mean beat templates; gray lines indicate the corresponding beat segments.

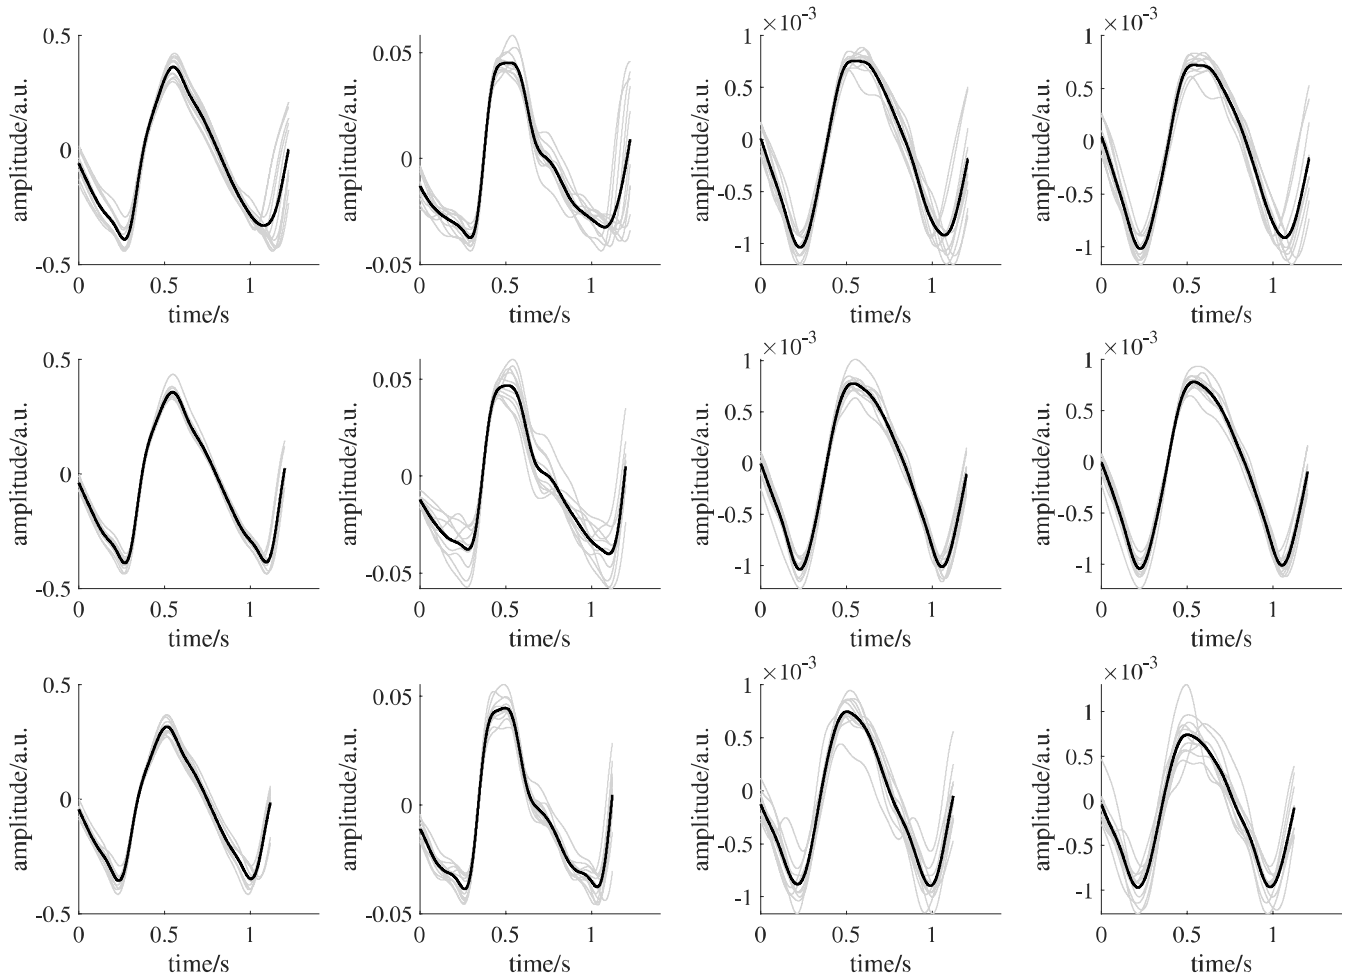

**Figure S28.** Template generation of one subject. From left to right: earlobe PPG (BL: 11 beats, ST1: 10 beats, ST2: 11 beats), finger PPG (BL: 11 beats, ST1: 10 beats, ST2: 11 beats), forehead iPPG (BL: 10 beats, ST1: 11 beats, ST2: 11 beats), super ROI iPPG (BL: 10 beats, ST1: 11 beats, ST2: 11 beats). The upper row shows signals during BL. The middle row shows signals during ST1. The lower row shows signals during ST2. Black lines indicate mean beat templates; gray lines indicate the corresponding beat segments.



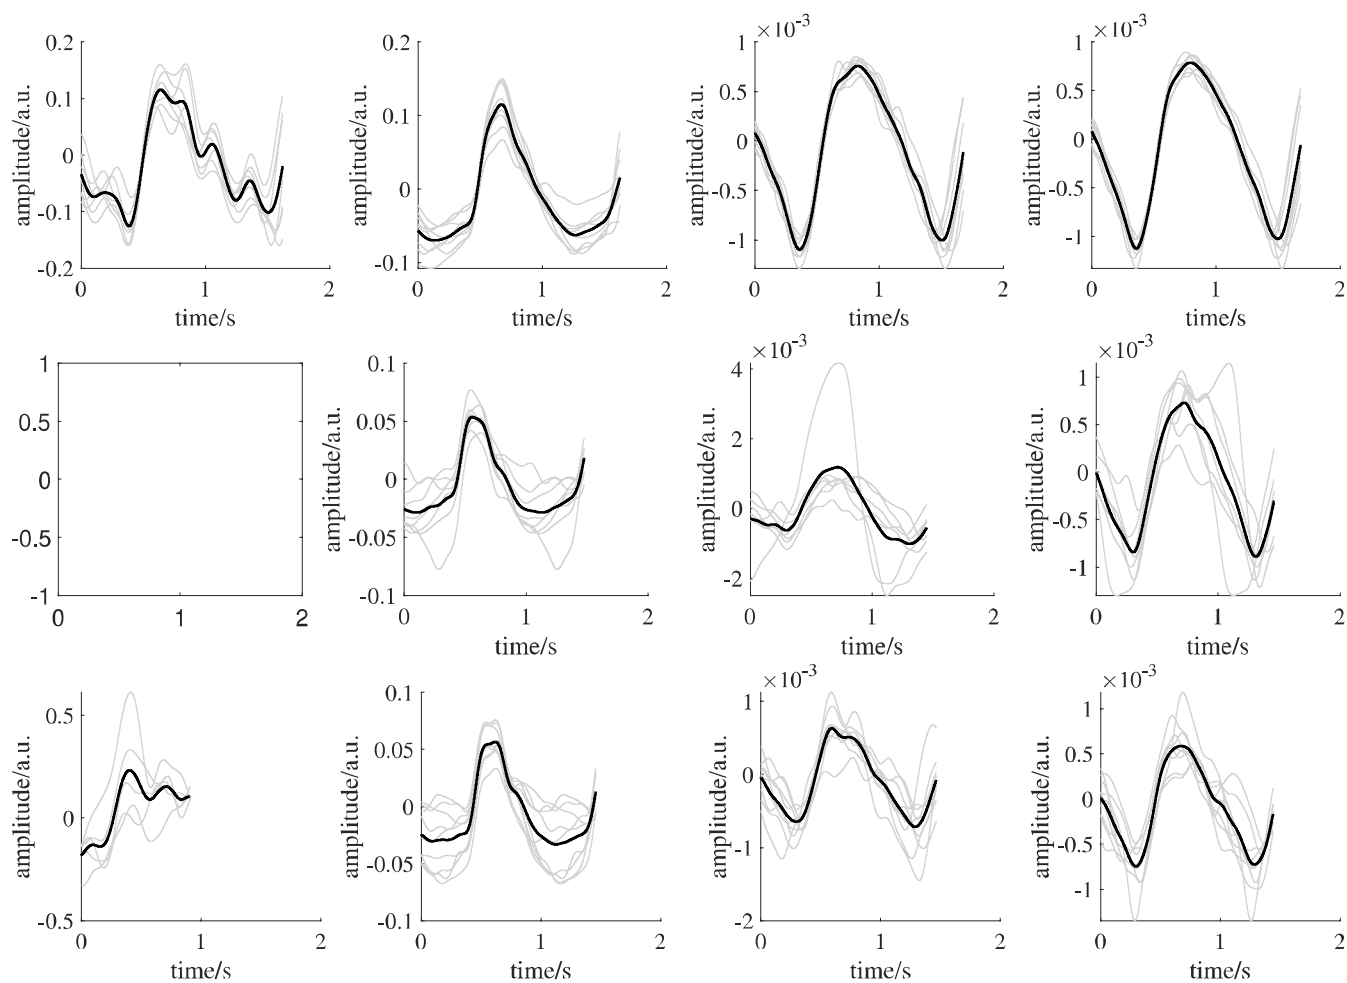

**Figure S29.** Template generation of one subject. From left to right: earlobe PPG (BL: 7 beats, ST1: 3 beats, ST2: 5 beats), finger PPG (BL: 8 beats, ST1: 8 beats, ST2: 9 beats), forehead iPPG (BL: 8 beats, ST1: 7 beats, ST2: 9 beats), super ROI iPPG (BL: 8 beats, ST1: 7 beats, ST2: 9 beats). The upper row shows signals during BL. The middle row shows signals during ST1. The lower row shows signals during ST2. Black lines indicate mean beat templates; gray lines indicate the corresponding beat segments.

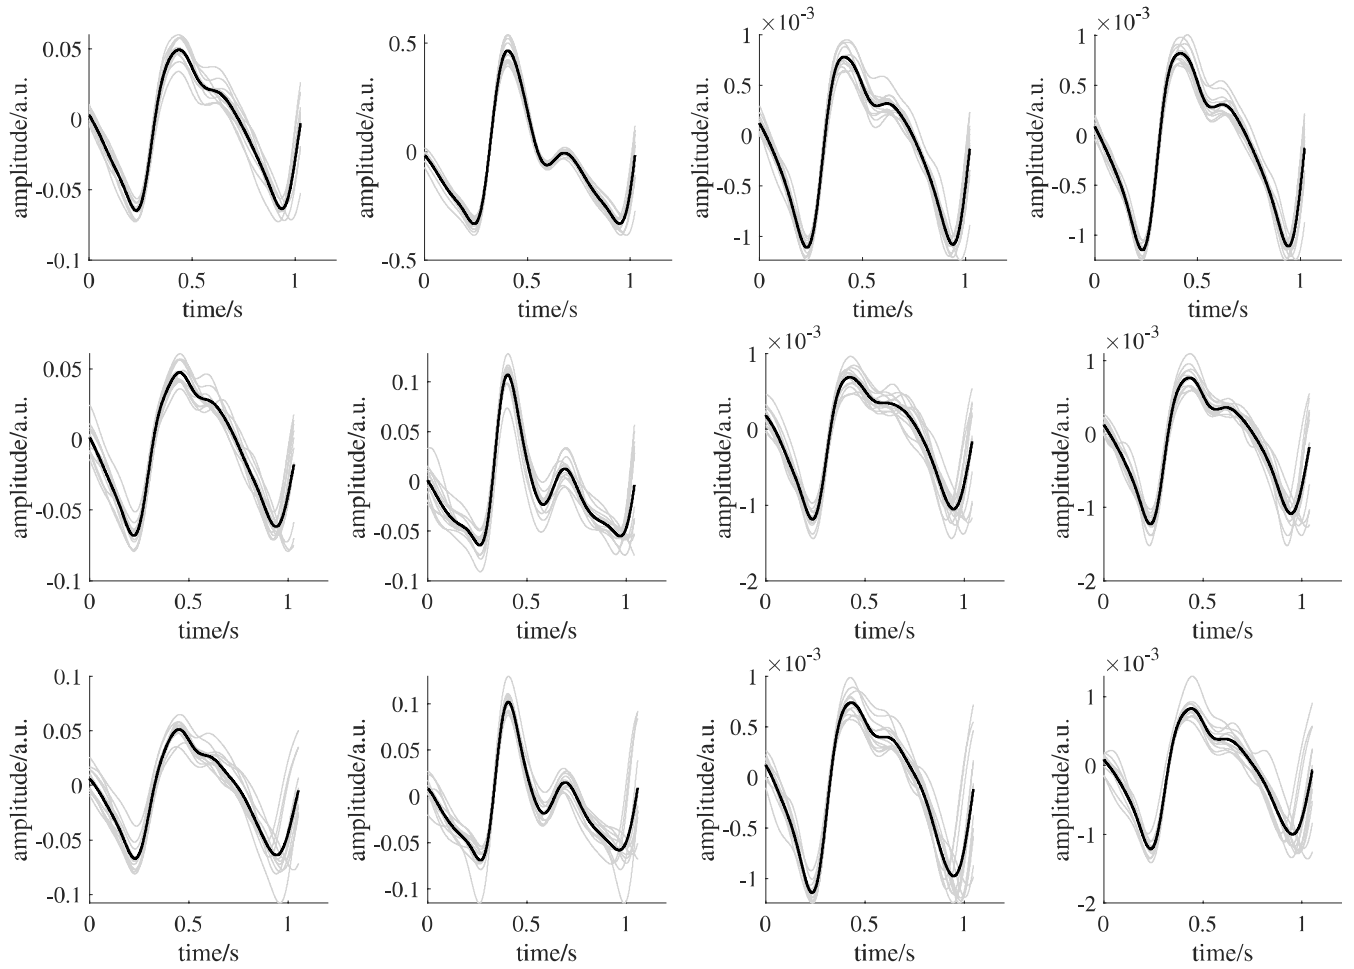

**Figure S30.** Template generation of one subject. From left to right: earlobe PPG (BL: 12 beats, ST1: 12 beats, ST2: 12 beats), finger PPG (BL: 12 beats, ST1: 12 beats, ST2: 12 beats), forehead iPPG (BL: 13 beats, ST1: 13 beats, ST2: 12 beats), super ROI iPPG (BL: 13 beats, ST1: 13 beats, ST2: 12 beats). The upper row shows signals during BL. The middle row shows signals during ST1. The lower row shows signals during ST2. Black lines indicate mean beat templates; gray lines indicate the corresponding beat segments.

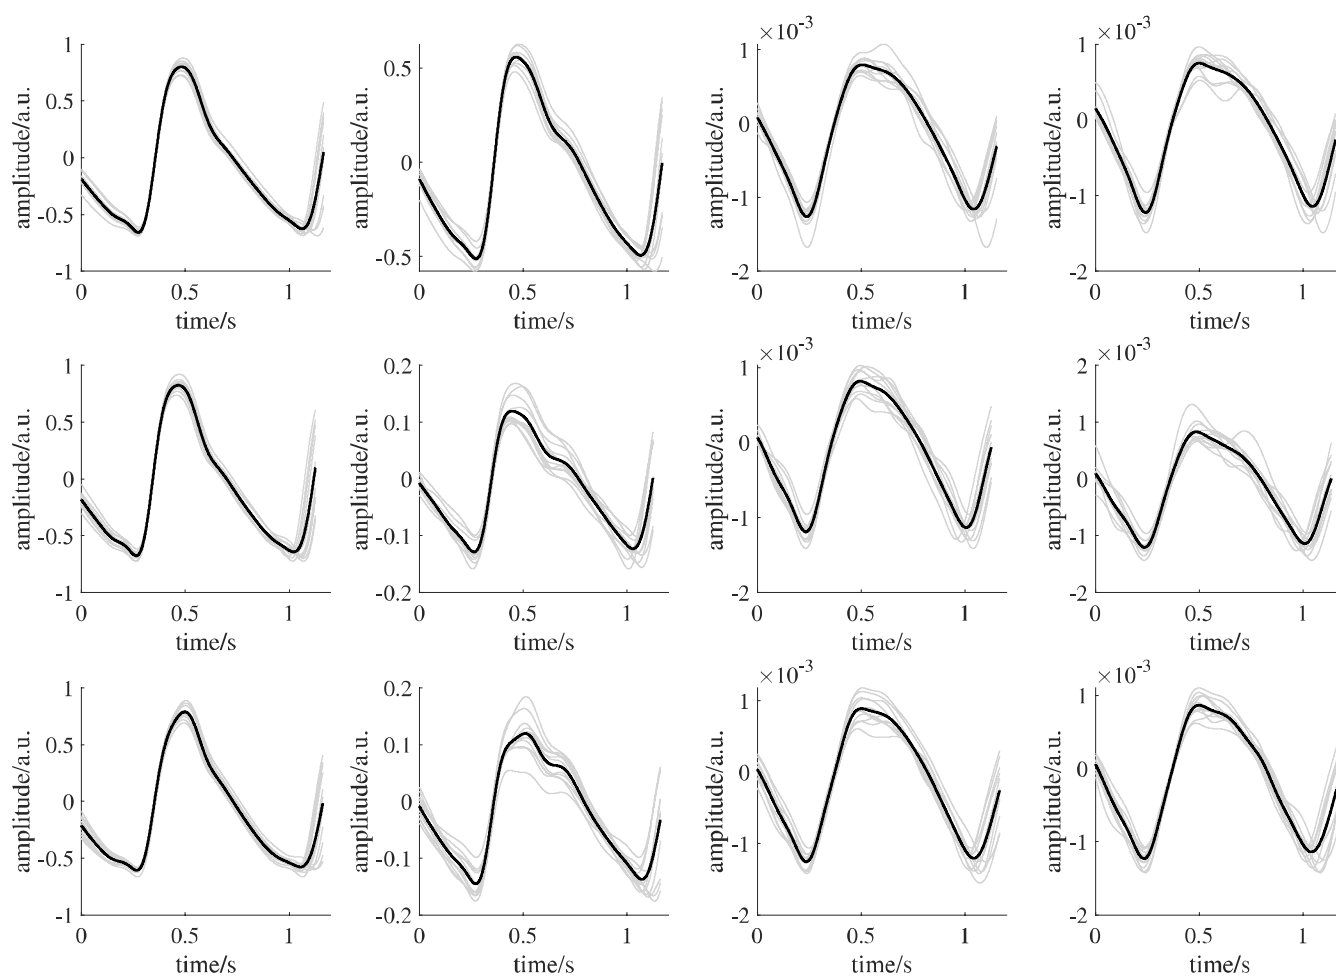

**Figure S31.** Template generation of one subject. From left to right: earlobe PPG (BL: 10 beats, ST1: 11 beats, ST2: 11 beats), finger PPG (BL: 11 beats, ST1: 11 beats, ST2: 11 beats), forehead iPPG (BL: 11 beats, ST1: 11 beats, ST2: 11 beats), super ROI iPPG (BL: 11 beats, ST1: 11 beats, ST2: 11 beats). The upper row shows signals during BL. The middle row shows signals during ST1. The lower row shows signals during ST2. Black lines indicate mean beat templates; gray lines indicate the corresponding beat segments.

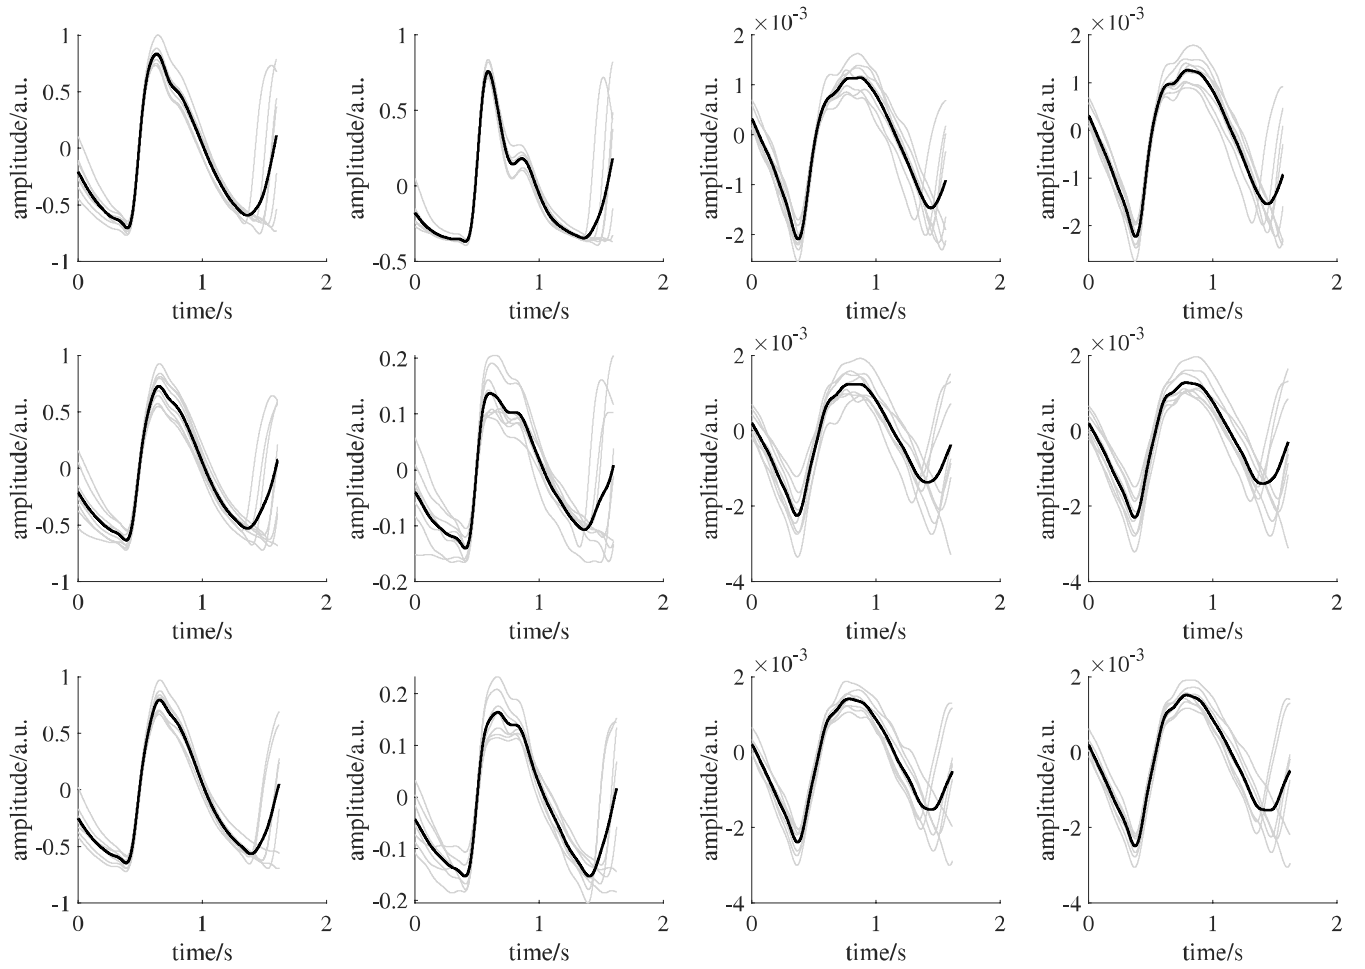

**Figure S32.** Template generation of one subject. From left to right: earlobe PPG (BL: 7 beats, ST1: 8 beats, ST2: 7 beats), finger PPG (BL: 7 beats, ST1: 8 beats, ST2: 7 beats), forehead iPPG (BL: 8 beats, ST1: 8 beats, ST2: 7 beats), super ROI iPPG (BL: 8 beats, ST1: 8 beats, ST2: 7 beats). The upper row shows signals during BL. The middle row shows signals during ST1. The lower row shows signals during ST2. Black lines indicate mean beat templates; gray lines indicate the corresponding beat segments.

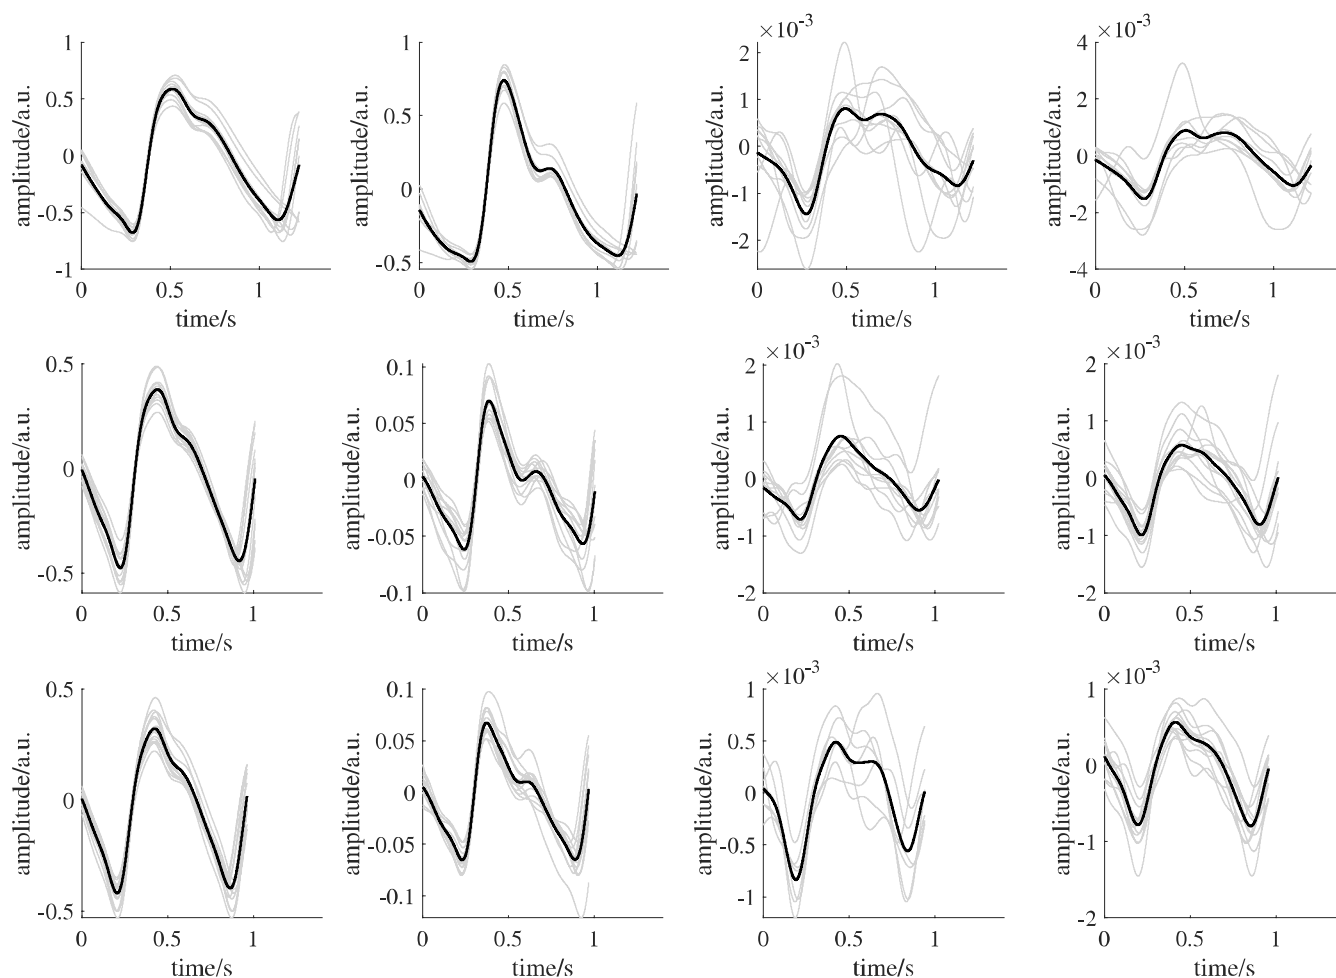

**Figure S33.** Template generation of one subject. From left to right: earlobe PPG (BL: 10 beats, ST1: 12 beats, ST2: 14 beats), finger PPG (BL: 9 beats, ST1: 12 beats, ST2: 14 beats), forehead iPPG (BL: 10 beats, ST1: 11 beats, ST2: 7 beats), super ROI iPPG (BL: 9 beats, ST1: 13 beats, ST2: 12 beats). The upper row shows signals during BL. The middle row shows signals during ST1. The lower row shows signals during ST2. Black lines indicate mean beat templates; gray lines indicate the corresponding beat segments.

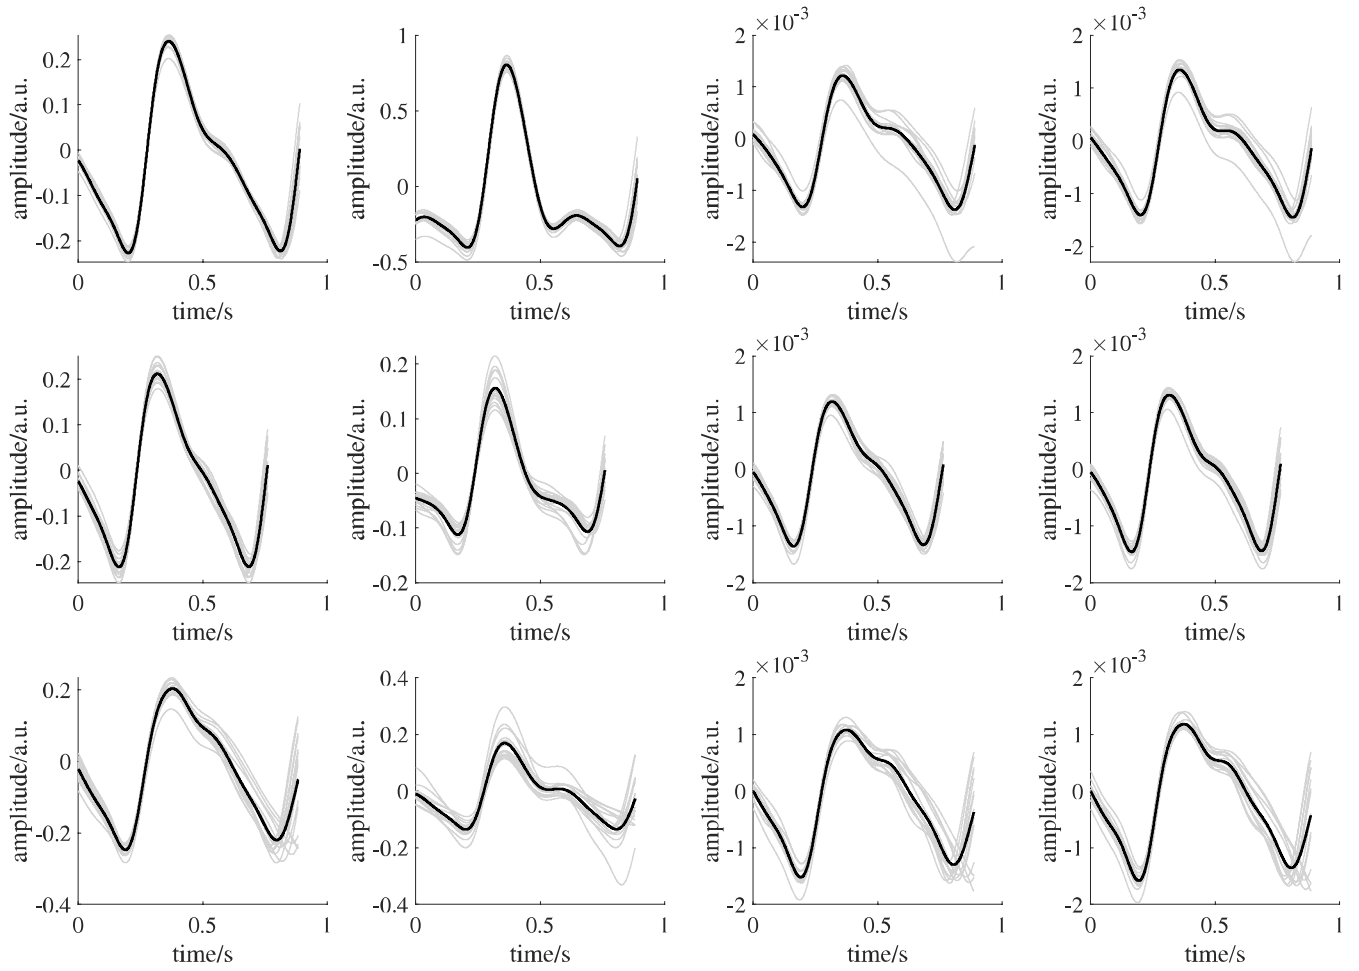

**Figure S34.** Template generation of one subject. From left to right: earlobe PPG (BL: 15 beats, ST1: 17 beats, ST2: 15 beats), finger PPG (BL: 15 beats, ST1: 17 beats, ST2: 15 beats), forehead iPPG (BL: 15 beats, ST1: 18 beats, ST2: 14 beats), super ROI iPPG (BL: 15 beats, ST1: 18 beats, ST2: 14 beats). The upper row shows signals during BL. The middle row shows signals during ST1. The lower row shows signals during ST2. Black lines indicate mean beat templates; gray lines indicate the corresponding beat segments.

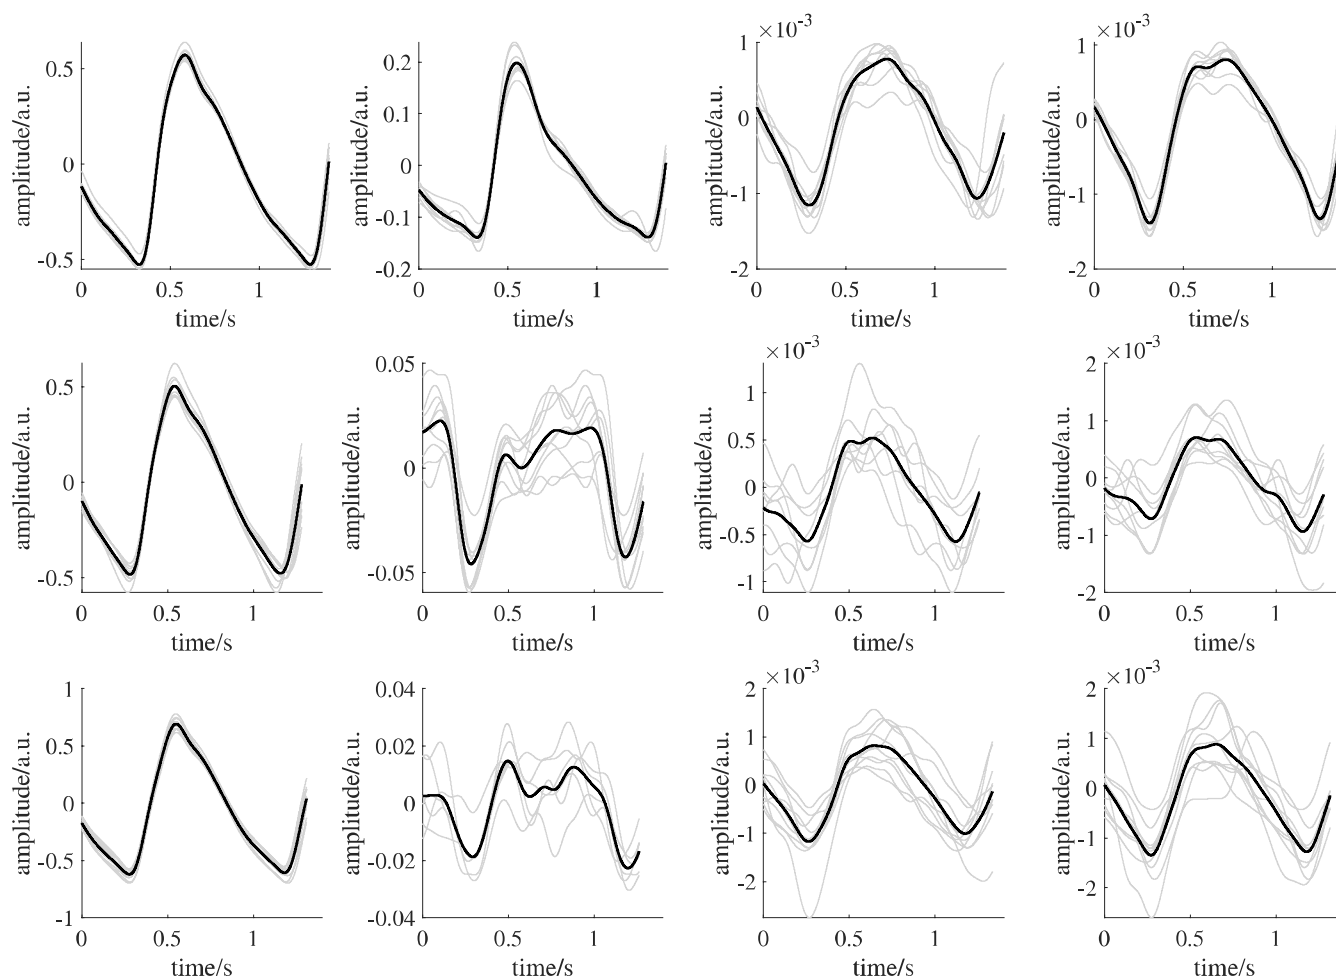

**Figure S35.** Template generation of one subject. From left to right: earlobe PPG (BL: 9 beats, ST1: 10 beats, ST2: 10 beats), finger PPG (BL: 9 beats, ST1: 10 beats, ST2: 6 beats), forehead iPPG (BL: 9 beats, ST1: 8 beats, ST2: 10 beats), super ROI iPPG (BL: 9 beats, ST1: 9 beats, ST2: 10 beats). The upper row shows signals during BL. The middle row shows signals during ST1. The lower row shows signals during ST2. Black lines indicate mean beat templates; gray lines indicate the corresponding beat segments.

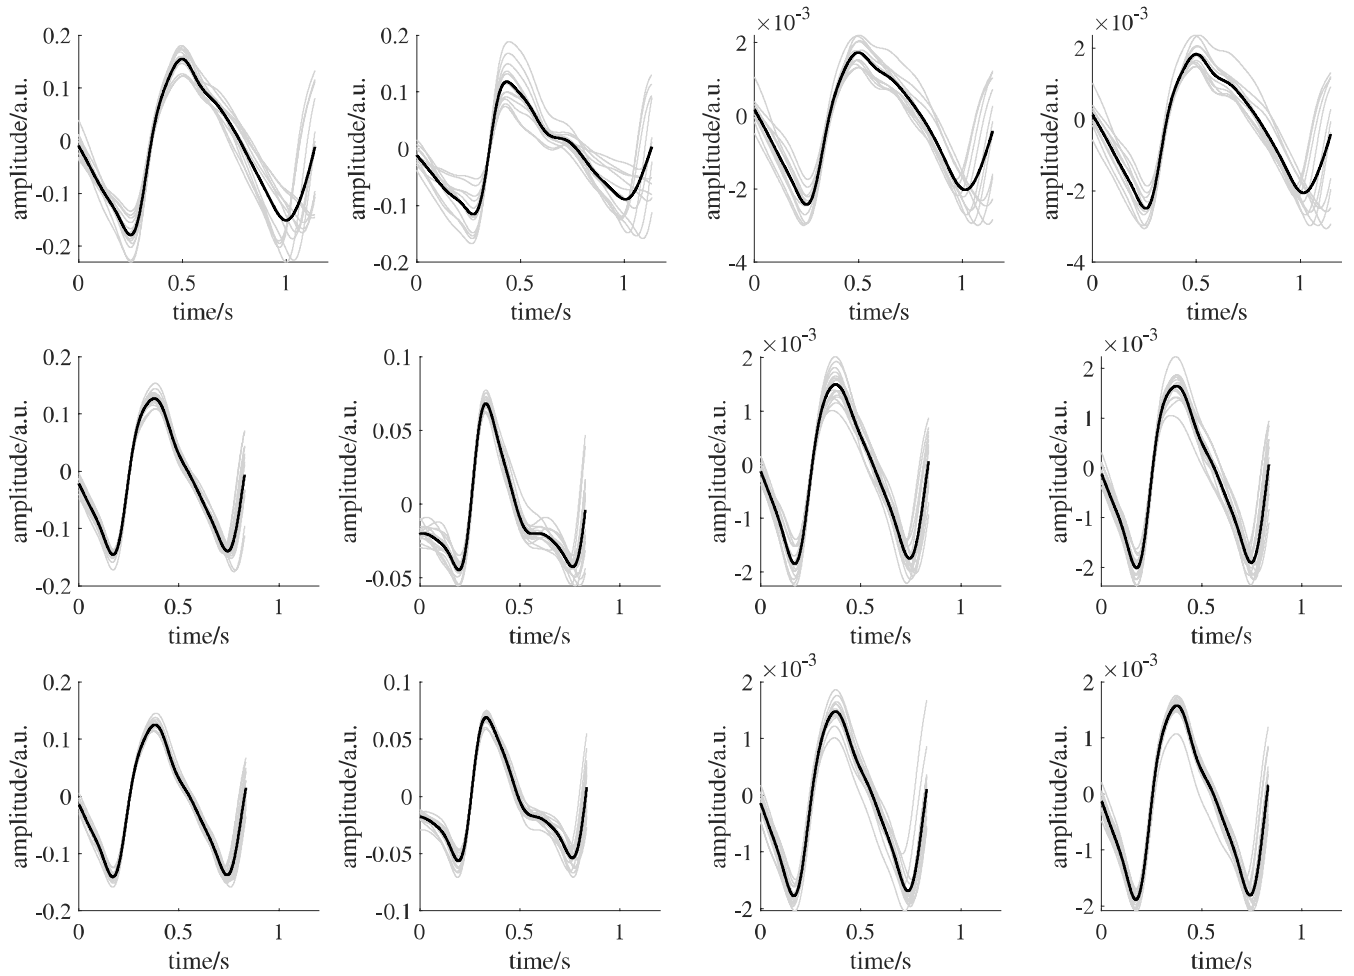

**Figure S36.** Template generation of one subject. From left to right: earlobe PPG (BL: 12 beats, ST1: 16 beats, ST2: 16 beats), finger PPG (BL: 12 beats, ST1: 16 beats, ST2: 16 beats), forehead iPPG (BL: 11 beats, ST1: 16 beats, ST2: 16 beats), super ROI iPPG (BL: 11 beats, ST1: 16 beats, ST2: 16 beats). The upper row shows signals during BL. The middle row shows signals during ST1. The lower row shows signals during ST2. Black lines indicate mean beat templates; gray lines indicate the corresponding beat segments.



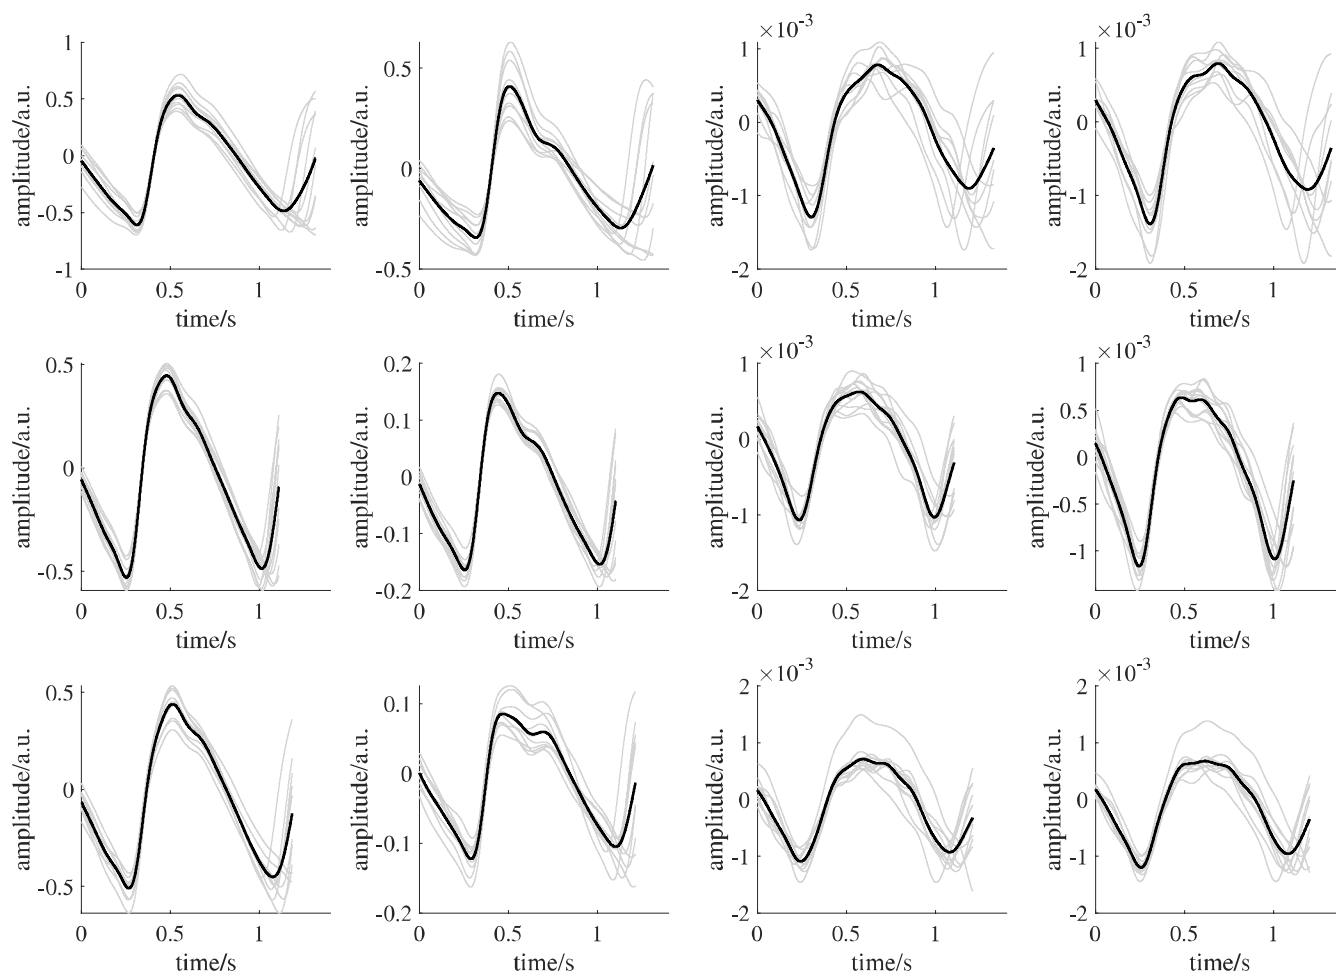

**Figure S37.** Template generation of one subject. From left to right: earlobe PPG (BL: 10 beats, ST1: 11 beats, ST2: 10 beats), finger PPG (BL: 10 beats, ST1: 11 beats, ST2: 10 beats), forehead iPPG (BL: 9 beats, ST1: 12 beats, ST2: 11 beats), super ROI iPPG (BL: 9 beats, ST1: 12 beats, ST2: 11 beats). The upper row shows signals during BL. The middle row shows signals during ST1. The lower row shows signals during ST2. Black lines indicate mean beat templates; gray lines indicate the corresponding beat segments.

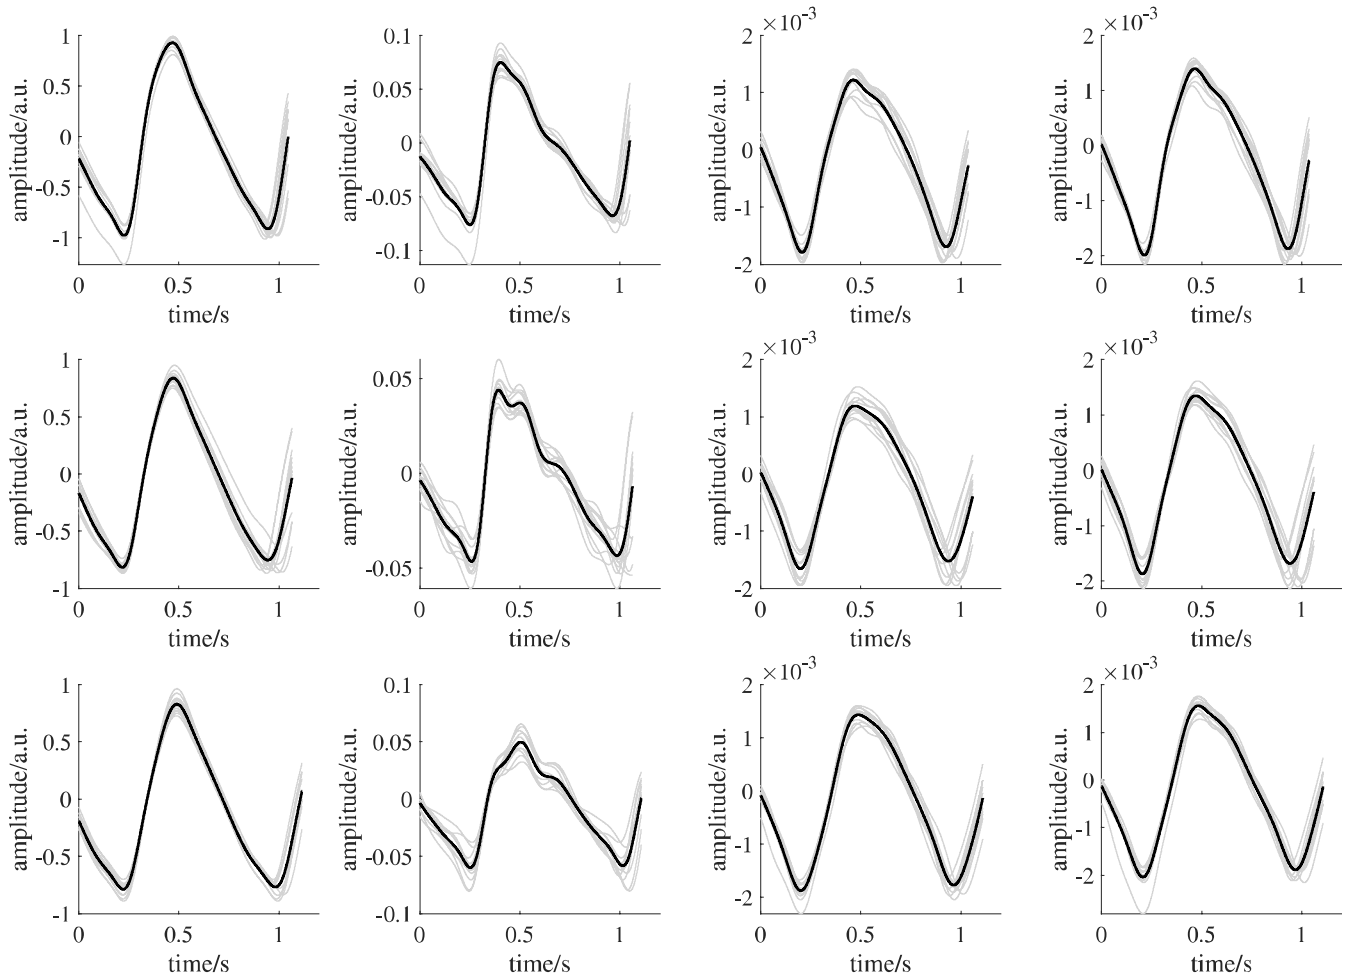

**Figure S38.** Template generation of one subject. From left to right: earlobe PPG (BL: 12 beats, ST1: 13 beats, ST2: 11 beats), finger PPG (BL: 12 beats, ST1: 13 beats, ST2: 11 beats), forehead iPPG (BL: 12 beats, ST1: 12 beats, ST2: 12 beats), super ROI iPPG (BL: 12 beats, ST1: 12 beats, ST2: 12 beats). The upper row shows signals during BL. The middle row shows signals during ST1. The lower row shows signals during ST2. Black lines indicate mean beat templates; gray lines indicate the corresponding beat segments.

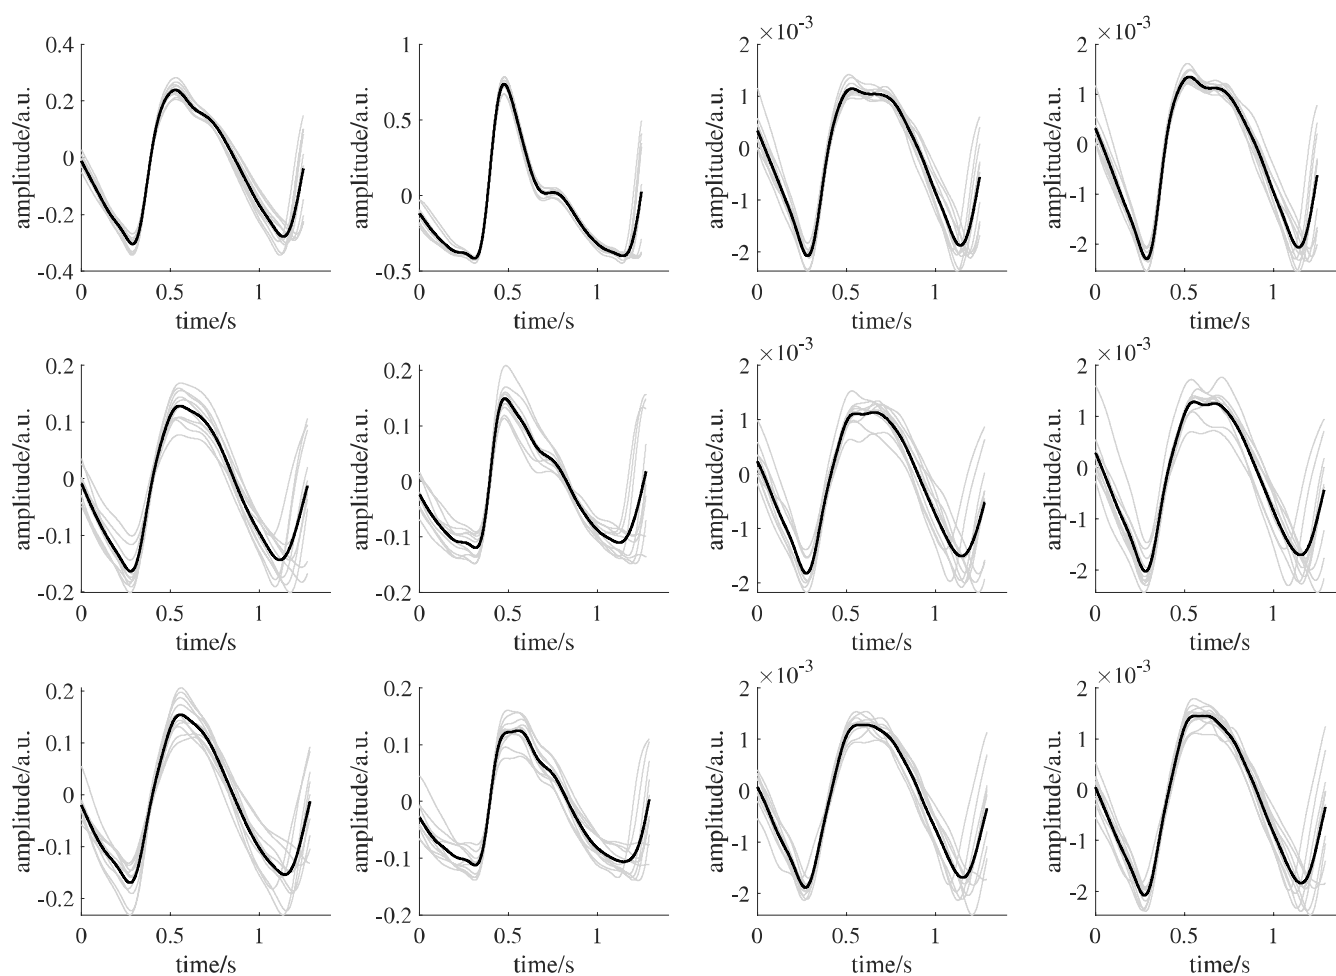

**Figure S39.** Template generation of one subject. From left to right: earlobe PPG (BL: 10 beats, ST1: 10 beats, ST2: 10 beats), finger PPG (BL: 10 beats, ST1: 10 beats, ST2: 10 beats), forehead iPPG (BL: 10 beats, ST1: 10 beats, ST2: 10 beats), super ROI iPPG (BL: 10 beats, ST1: 10 beats, ST2: 10 beats). The upper row shows signals during BL. The middle row shows signals during ST1. The lower row shows signals during ST2. Black lines indicate mean beat templates; gray lines indicate the corresponding beat segments.
